# Supplementary material for: Genome-wide analysis of copy number variants and normal facial variation in a large cohort of Bantu Africans
Source: PubMed Central journal article supplement — HGG Adv. 2021 Dec 24;3(1):100082. doi: 10.1016/j.xhgg.2021.100082 (PMC8756499; doi:10.1016/j.xhgg.2021.100082), 2021-12-24
Supplement: mmc1.pdf [file mmc1.pdf]

**HGGA, Volume 3**

**Supplemental information**

**Genome-wide analysis of copy number  
variants and normal facial variation  
in a large cohort of Bantu Africans**

**Megan Null, Feyza Yilmaz, David Astling, Hung-Chun Yu, Joanne B. Cole, Benedikt Hallgrímsson, Stephanie A. Santorico, Richard A. Spritz, Tamim H. Shaikh, and Audrey E. Hendricks**

|                  |               |
|------------------|---------------|
| Figures S1 – S12 | Pages 1 – 13  |
| Tables S1 – S2   | Page 14 – 15  |
| Table S5         | Page 16       |
| Tables S7 – S8   | Pages 17 – 18 |
| Table S12        | Page 19       |

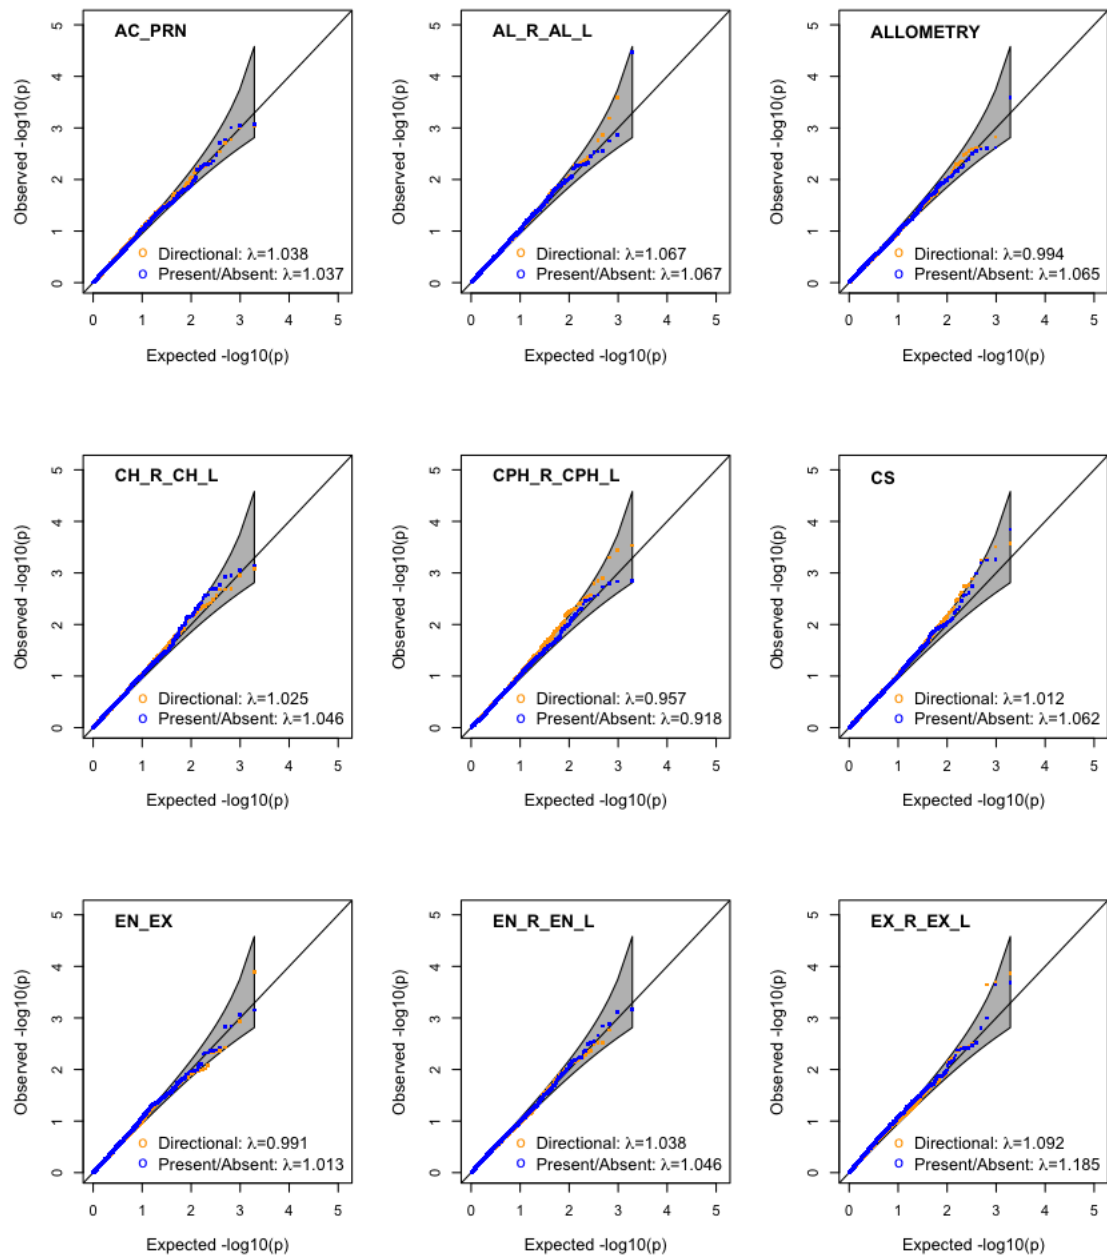

**Figure S1. Quantile-Quantile Plots.** QQ plots for nine phenotypes for the *absent/present* (blue) and *directional* (orange) models with respective  $\lambda$  values. Due to high correlation between overlapping analysis windows within a region, a random window from each region was selected for the QQ plot.

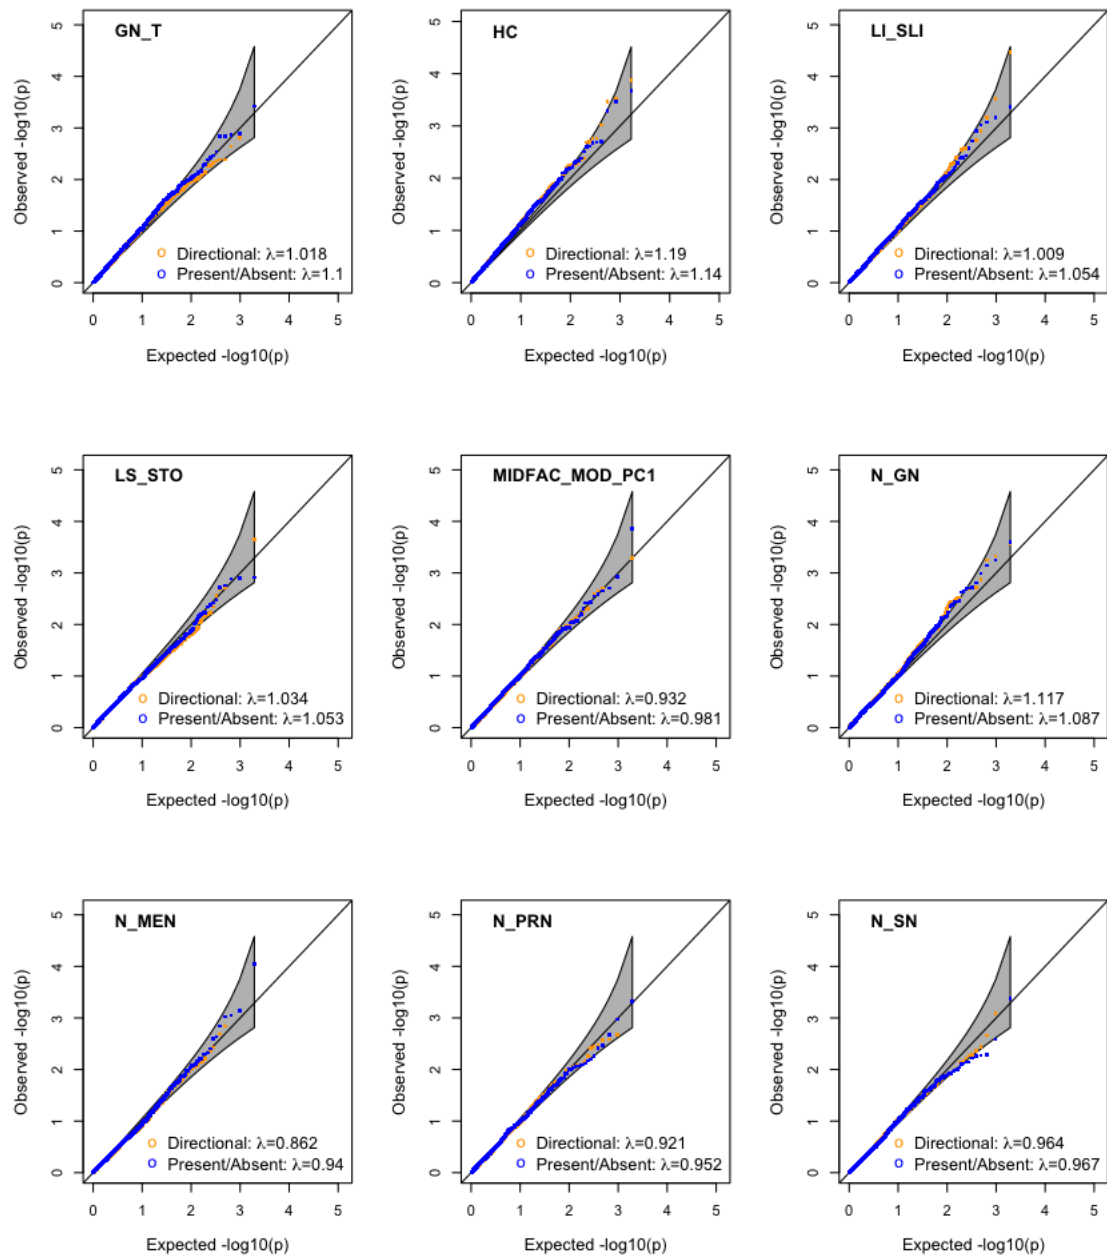

**Figure S2. Quantile-Quantile Plots.** QQ plots for nine phenotypes for the *absent/present* (blue) and *directional* (orange) models with respective  $\lambda$  values. Due to high correlation between overlapping analysis windows within a region, a random window from each region was selected for the QQ plot.

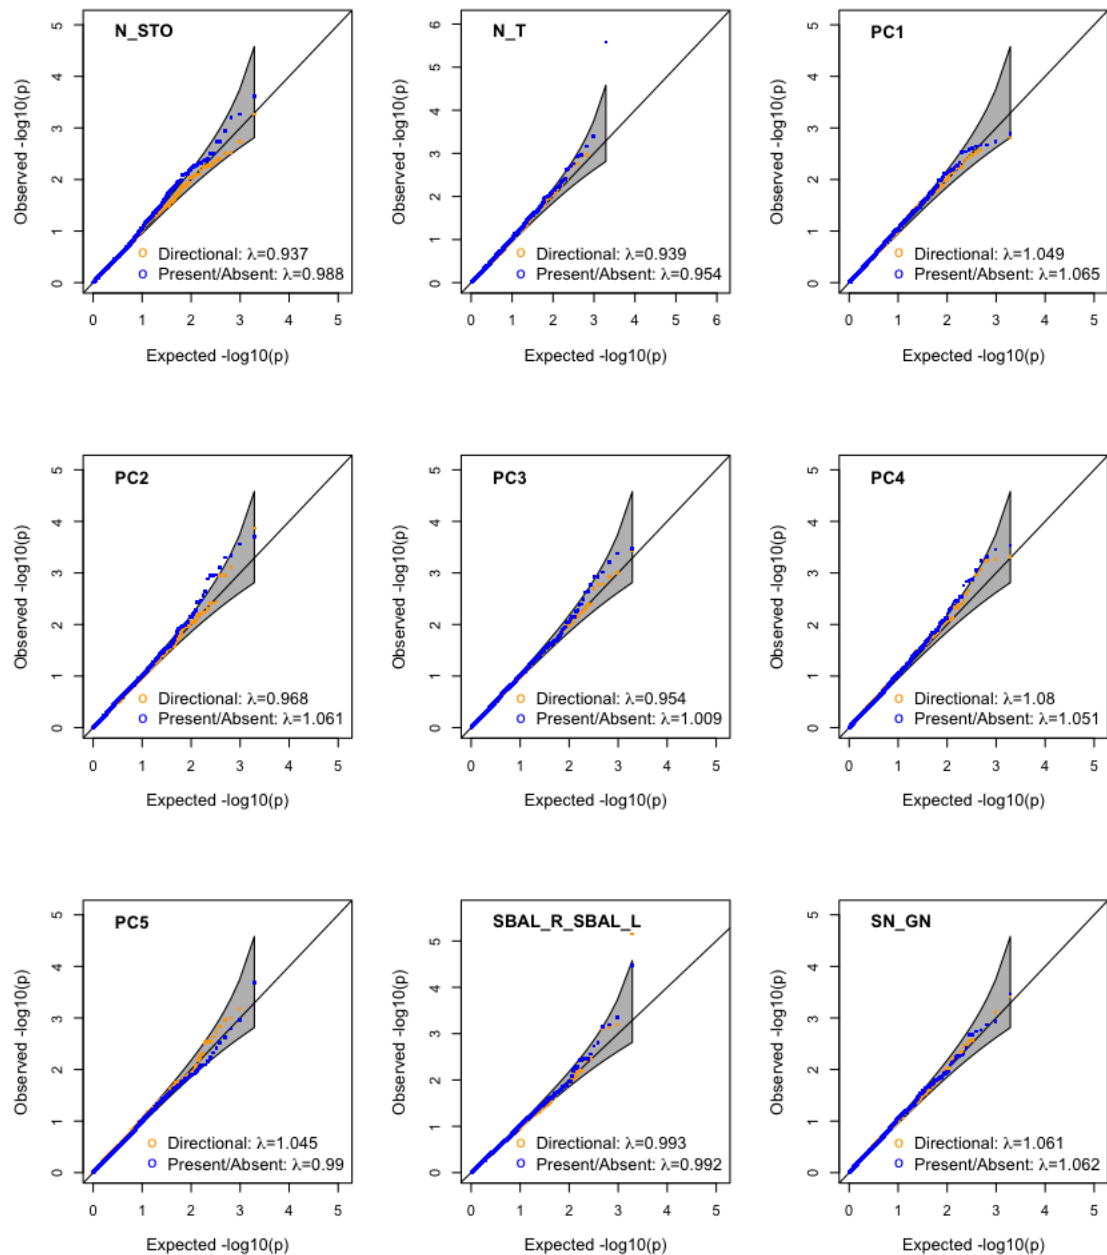

**Figure S3. Quantile-Quantile Plots.** QQ plots for nine phenotypes for the *absent/present* (blue) and *directional* (orange) models with respective  $\lambda$  values. Due to high correlation between overlapping analysis windows within a region, a random window from each region was selected for the QQ plot.

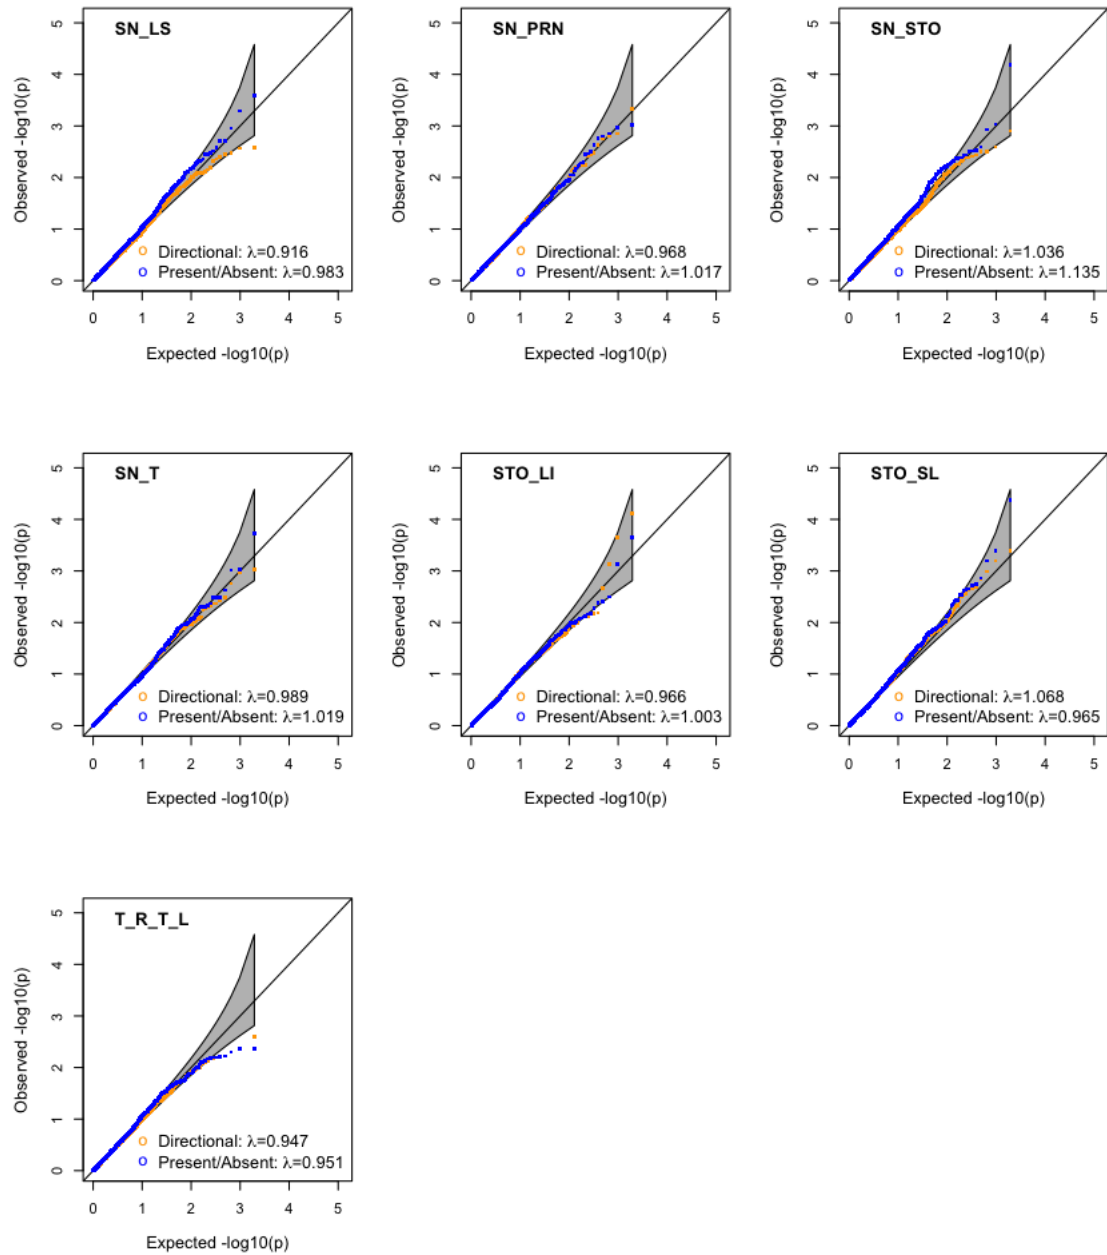

**Figure S4. Quantile-Quantile Plots.** QQ plots for seven phenotypes for the *absent/present* (blue) and *directional* (orange) models with respective  $\lambda$  values. Due to high correlation between overlapping analysis windows within a region, a random window from each region was selected for the QQ plot.

**A**

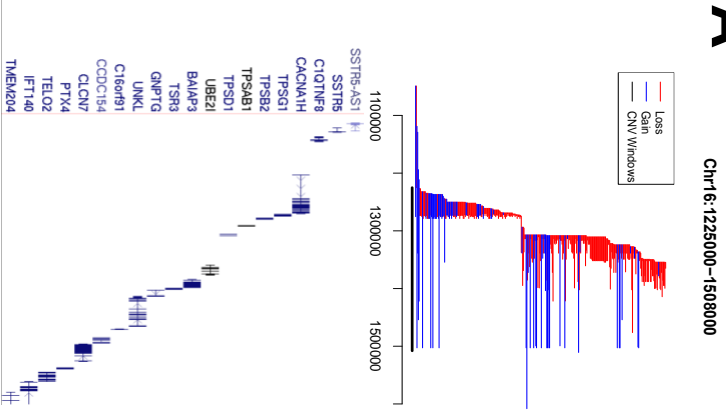

**B**

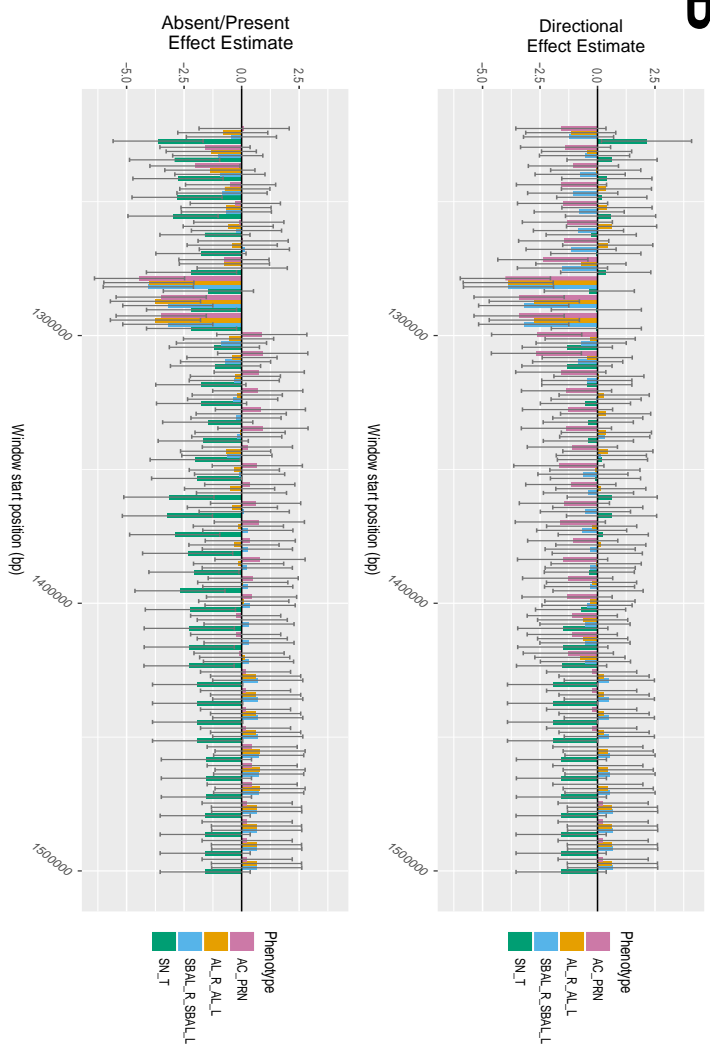

**Figure S5 A). Region Plot, Chromosome 16.** Loss (red) and gain (blue) CNVs. Each line represents a unique CNV allele from one individual with the genes in the region shown below. The CNV analysis region is shown in black. **B). Region Plot, Chromosome 16.** Test statistic t-values (effect estimate / standard error of effect estimate) across the region with 95% confidence intervals in the *directional* model (top) and *absent/present* model (bottom). Phenotypes with at least one window with p-value  $< 5 \times 10^{-4}$  are shown: nasal ala length (AC\_PRN), nasal width (AL\_R\_AL\_L), subnasal width (SBAL\_R\_SBAL\_L), and midfacial depth (SN\_T).



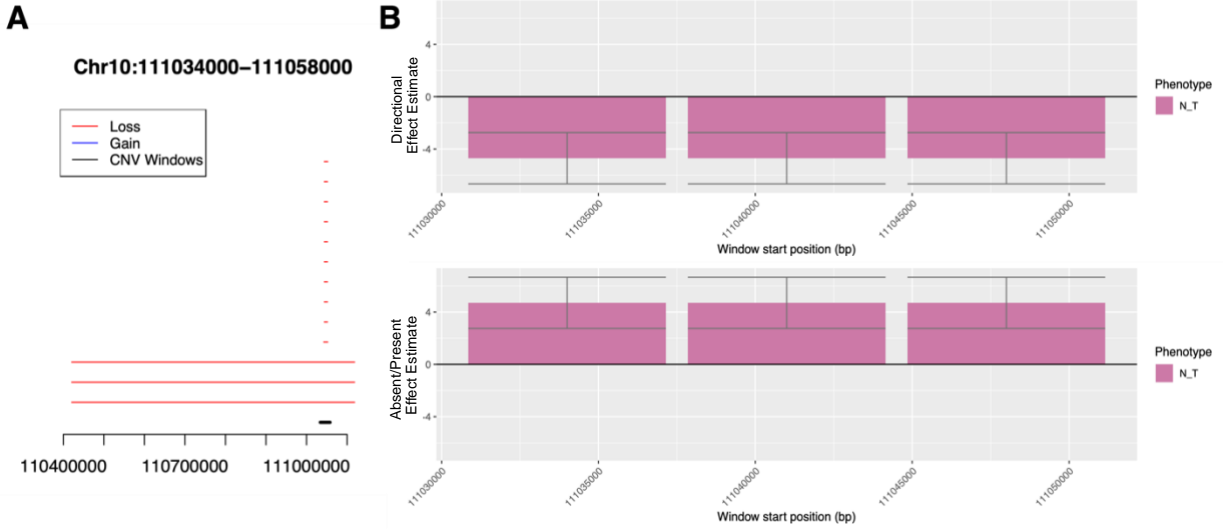

**Figure S6. Region Plot, Chromosome 10. A)** Loss (red) and gain (blue, none present) CNVs. Each line represents a unique CNV allele from one individual with the genes in the region shown below. The CNV analysis region is shown in black. This region does not have any genes. **B)** Test statistic t-values (effect estimate / standard error of effect estimate) across the region with 95% confidence intervals the *directional* model (top) and *absent/present* model (bottom). Upper facial depth (N\_T), the only phenotype with p-value  $< 5 \times 10^{-4}$ , is shown.

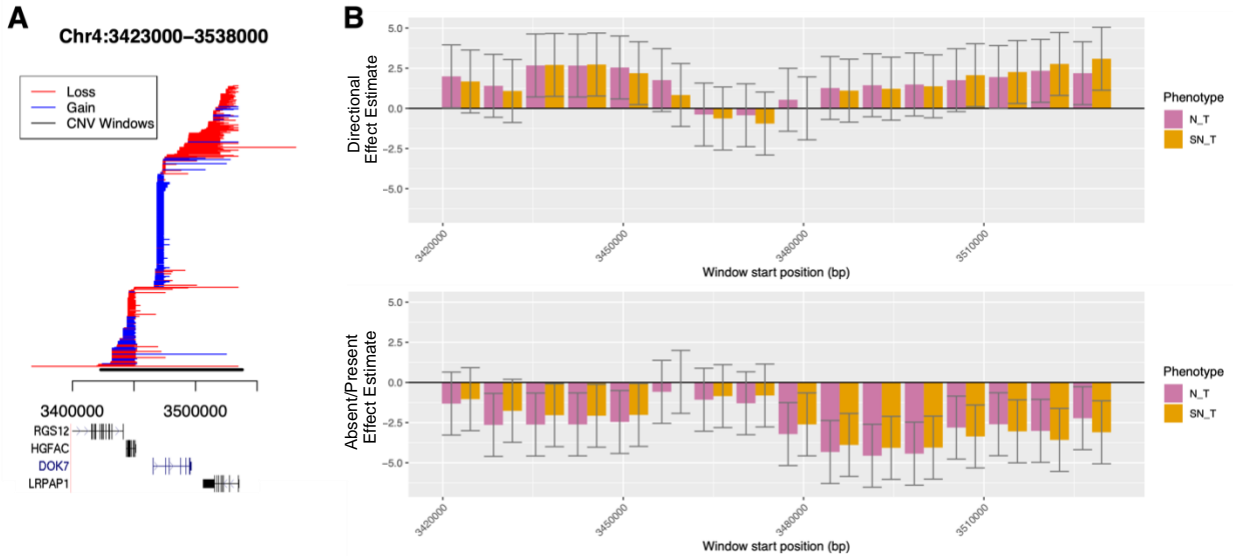

**Figure S7. Region Plot, Chromosome 4.** **A)** Loss (red) and gain (blue) CNVs. Each line represents a unique CNV allele from one individual with the genes in the region shown below. The CNV analysis region is shown in black **B)** Test statistic t-values (effect estimate / standard error of effect estimate) across the region with 95% confidence intervals in the *directional* model (top) and *absent/present* model (bottom). Phenotypes with at least one window with p-value <  $5 \times 10^{-4}$  are shown: upper facial depth (N\_T) and midfacial depth (SN\_T).

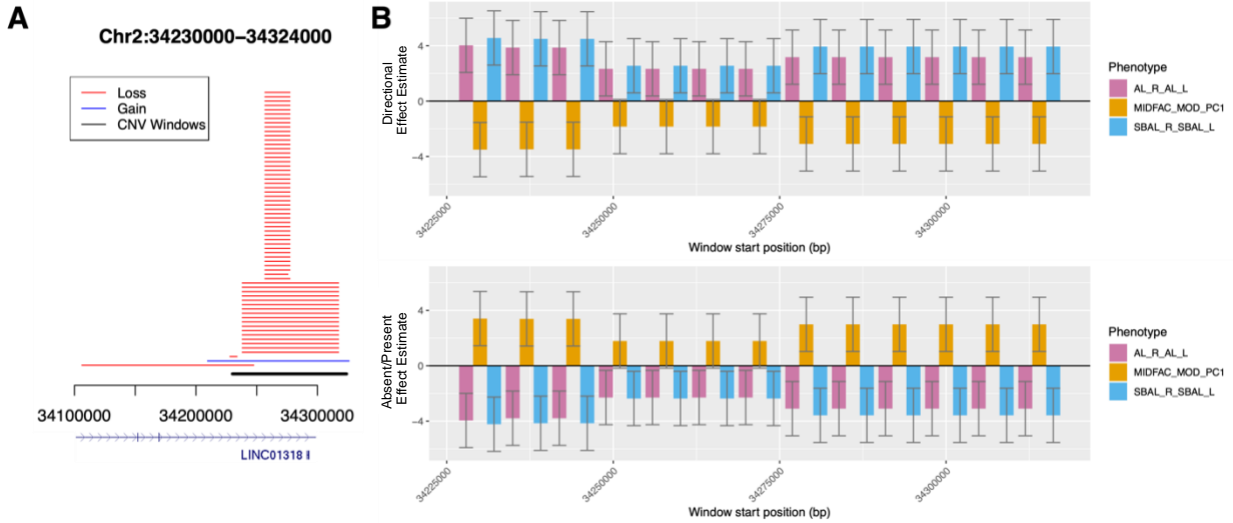

**Figure S8. Region Plot, Chromosome 2.** **A**) Loss (red) and gain (blue) CNVs. Each line represents a unique CNV allele from one individual with the genes in the region shown below. The CNV analysis region is shown in black **B**) Test statistic t-values (effect estimate / standard error of effect estimate) across the region with 95% confidence intervals in the *directional* model (top) and *absent/present* model (bottom). Phenotypes with at least one window with p-value <  $5 \times 10^{-4}$  are shown: nasal width (AL\_R\_AL\_L), mid-face principal component 1 (MIDFAC\_MOD\_PC1), and subnasal width (SBAL\_R\_SBAL\_L).

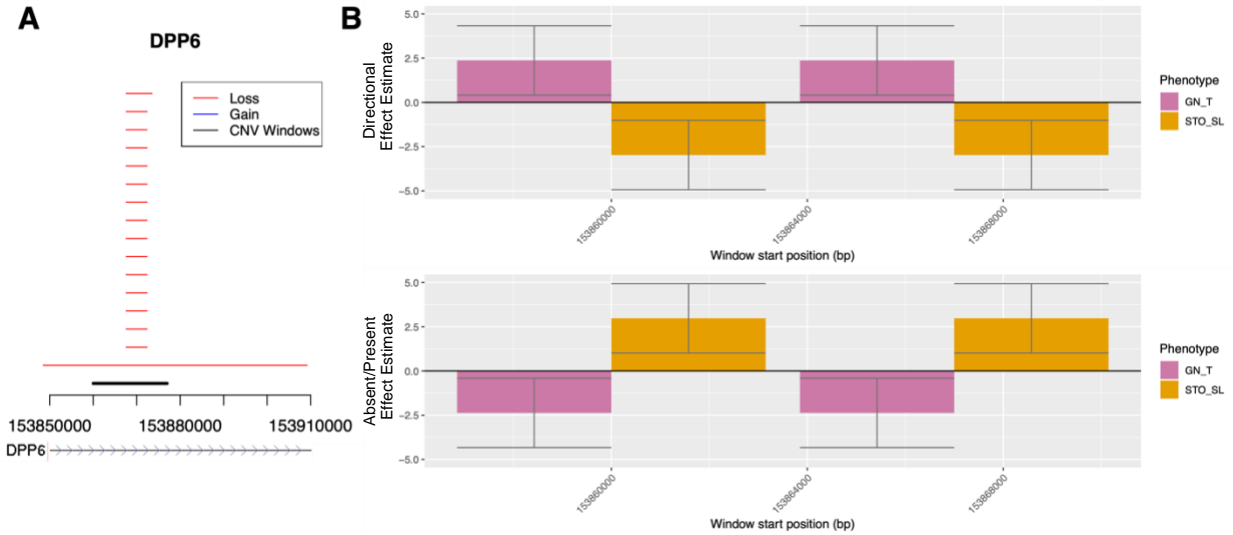

**Figure S9. Region Plot, *DPP6*.** A) Loss (red) and gain (blue) CNVs. Each line represents a unique CNV allele from one individual with the genes in the region shown below. The CNV analysis region is shown in black B) Test statistic t-values (effect estimate / standard error of effect estimate) across the region with 95% confidence intervals in the *directional* model (top) and *absent/present* model (bottom). Phenotypes with at least one window with p-value  $< 5 \times 10^{-4}$  are shown: lower facial depth (GN\_T) and lower lip height (STO\_SL).

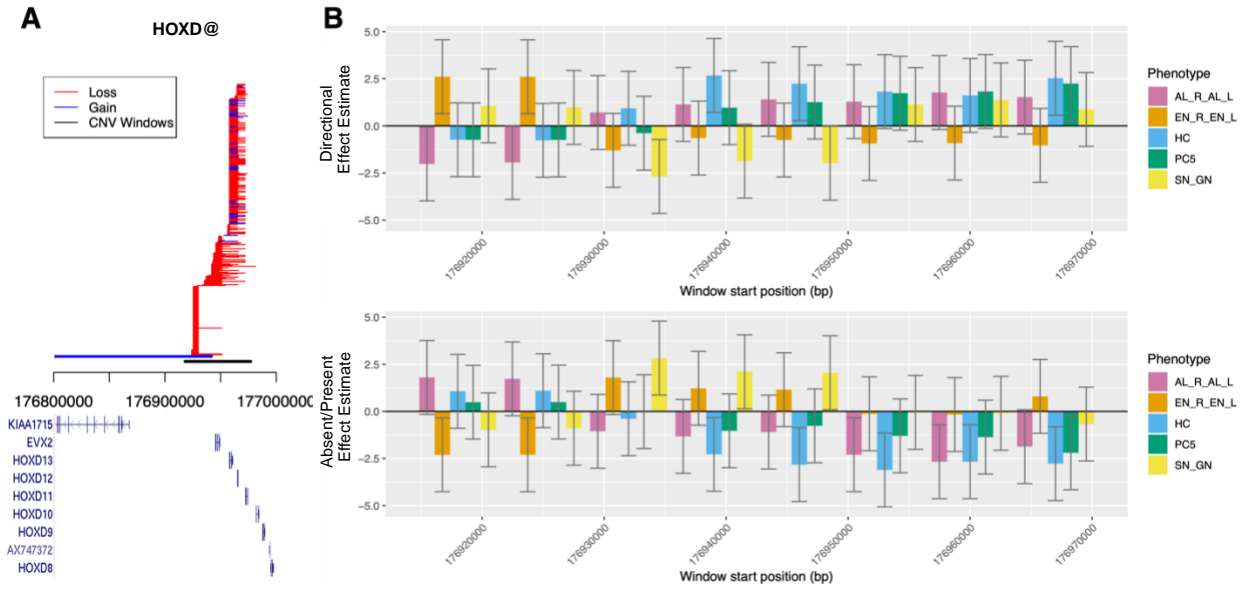

**Figure S10. Region Plot, *HOXD@*.** **A**) Loss (red) and gain (blue) CNVs. Each line represents a unique CNV allele from one individual with the genes in the region shown below. The CNV analysis region is shown in black **B**) Test statistic t-values (effect estimate / standard error of effect estimate) across the region with 95% confidence intervals in the *directional* model (top) and *absent/present* model (bottom). Phenotypes with at least one window with p-value  $< 5 \times 10^{-4}$  are shown: nasal width (AL\_R\_AL\_L), inner canthal width (EN\_R\_EN\_L), head circumference (HC), principal component 5: nose shape, height of mouth (PC5), and lower facial height (SN\_GN).

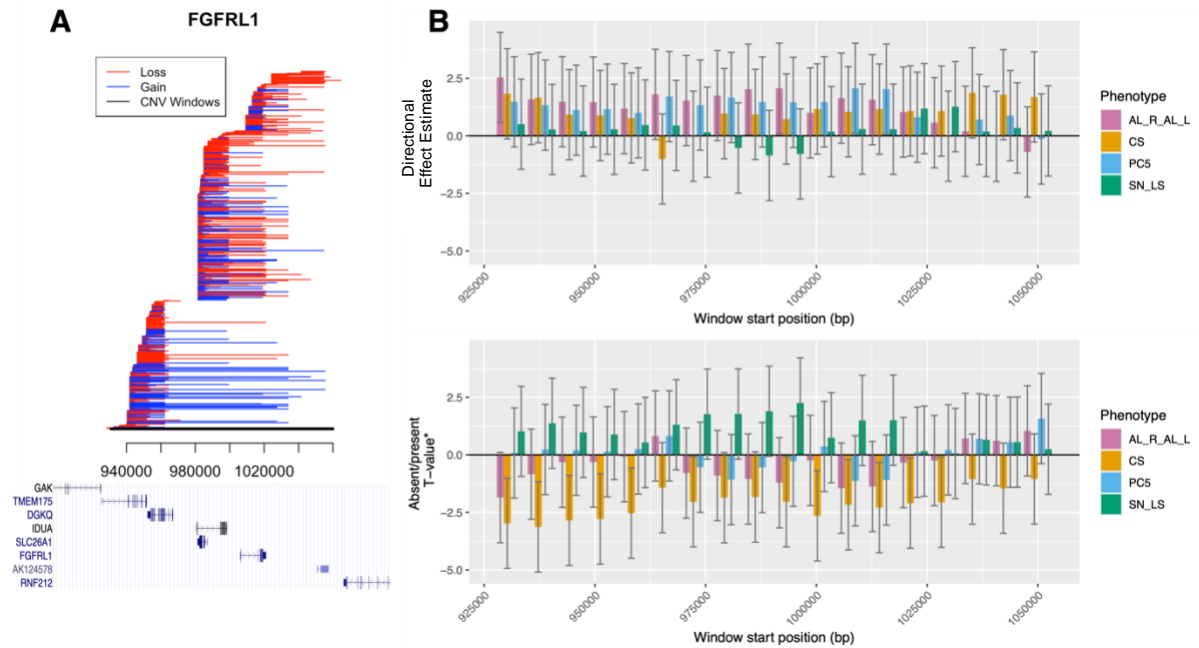

**Figure S11. Region Plot, *FGFR1*.** **A**) Loss (red) and gain (blue) CNVs. Each line represents a unique CNV allele from one individual with the genes in the region shown below. The CNV analysis region is shown in black **B**) Test statistic t-values (effect estimate / standard error of effect estimate) across the region with 95% confidence intervals in the *directional* model (top) and *absent/present* model (bottom). Phenotypes with at least one window with p-value < 0.05 are shown: nasal width (AL\_R\_AL\_L), centroid size (CS), principal component 5: nose shape, height of mouth (PC5), and philtrum length (SN\_LS).

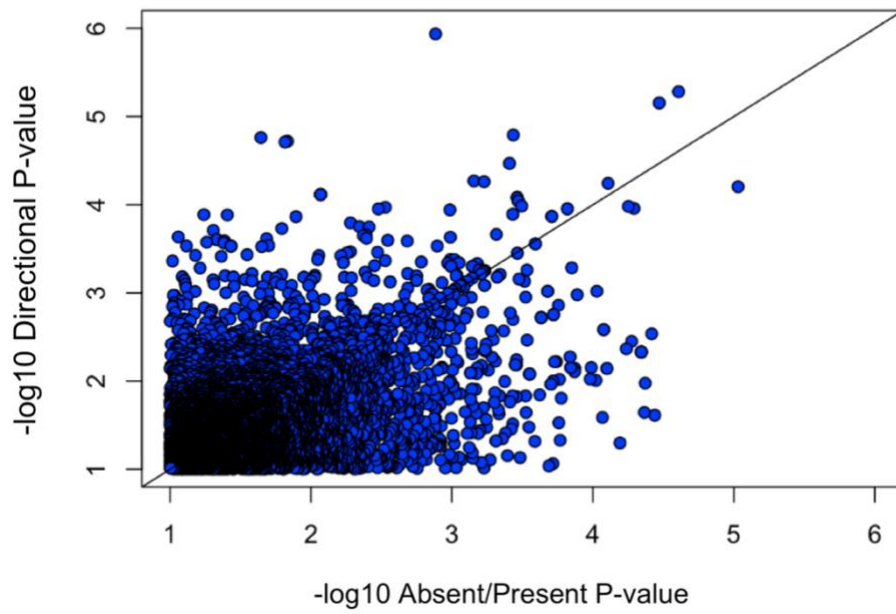

**Figure S12. Scatterplot Comparing *Absent/Present* and *Directional* models.** Scatterplot of  $-\log_{10} pvalue$  from each model. Each point represents a window with both gains and losses.

**Table S1. Facial Phenotypes**

| Measurement              | Description                                                                               |
|--------------------------|-------------------------------------------------------------------------------------------|
| Total Facial Measurement |                                                                                           |
| Centroid Size            | Face size                                                                                 |
| Allometry                | Variation in shape due to size                                                            |
| Mid-Face PC1             | The first principal component from a midfacial landmark network around the nose and mouth |
| Principal Component 1    | Upper facial height, mid facial width                                                     |
| Principal Component 2    | Overall facial height, lower facial height                                                |
| Principal Component 3    | Upper and middle facial width                                                             |
| Principal Component 4    | Width of nose, mandible height                                                            |
| Principal Component 5    | Nose shape, height of mouth                                                               |
| Linear Distances         |                                                                                           |
| AL_R_AL_L                | Nasal Width                                                                               |
| AC_PRN                   | Nasal Ala Length (average)                                                                |
| CH_R_CH_L                | Mouth Width                                                                               |
| CPH_R_CPH_L              | Philtrum Width                                                                            |
| EN_EX                    | Palpebral Fissure Length (average)                                                        |
| EN_R_EN_L                | Inner canthal Width                                                                       |
| EX_R_EX_L                | Outer canthal Width                                                                       |
| GN_T                     | Lower Facial Depth (average)                                                              |
| LI_SL                    | Cutaneous Lower Lip Height                                                                |
| LS_STO                   | Upper Vermillion Height                                                                   |
| N_GN                     | Morphological Facial Height                                                               |
| N_MEN                    | Nasion to Midendocanthion                                                                 |
| N_PRN                    | Nasal Bridge Length                                                                       |
| N_SN                     | Nasal Height                                                                              |
| N_STO                    | Upper Facial Height                                                                       |
| N_T                      | Upper Facial Depth (average)                                                              |
| SBAL_R_SBAL_L            | Subnasal Width                                                                            |
| SN_GN                    | Lower Facial Height                                                                       |
| SN_LS                    | Philtrum Length                                                                           |
| SN_PRN                   | Nasal Protrusion                                                                          |
| SN_STO                   | Upper Lip Height                                                                          |
| SN_T                     | Midfacial Depth (average)                                                                 |
| STO_LI                   | Lower Vermillion Height                                                                   |
| STO_SL                   | Lower lip height                                                                          |
| T_R_T_L                  | Facial Width                                                                              |
| Non-landmark defined     |                                                                                           |
| Head Circumference       | Direct occipital frontal circumference                                                    |



**Table S2. Non-missing Phenotypes**

| <b>Phenotype</b> | <b>Non-missing Subjects</b> |
|------------------|-----------------------------|
| CS               | 3388                        |
| ALLOMETRY        | 3388                        |
| MIDFAC_MOD_PC1   | 3387                        |
| PC1              | 3388                        |
| PC2              | 3388                        |
| PC3              | 3388                        |
| PC4              | 3388                        |
| PC5              | 3388                        |
| T_R_T_L          | 3388                        |
| N_T              | 3386                        |
| SN_T             | 3388                        |
| GN_T             | 3385                        |
| N_GN             | 3388                        |
| N_STO            | 3387                        |
| SN_GN            | 3387                        |
| EN_R_EN_L        | 3386                        |
| EX_R_EX_L        | 3387                        |
| EN_EX            | 3384                        |
| AL_R_AL_L        | 3388                        |
| SBAL_R_SBAL_L    | 3384                        |
| SN_PRN           | 3387                        |
| AC_PRN           | 3378                        |
| N_SN             | 3385                        |
| N_PRN            | 3386                        |
| CH_R_CH_L        | 3387                        |
| CPH_R_CPH_L      | 3387                        |
| SN_LS            | 3388                        |
| SN_STO           | 3386                        |
| STO_SL           | 3385                        |
| LS_STO           | 3387                        |
| STO_LI           | 3388                        |
| LI_SLI           | 3382                        |
| N_MEN            | 3387                        |
| HC               | 2589                        |

**Table S5. Family Wise Error Rate Significance Thresholds**

| <b>Analysis</b>                                              | <b>Effective Number of Phenotypes</b> | <b>Effective Number of Tests*</b> | <b>Study wide FWER significance threshold</b> |
|--------------------------------------------------------------|---------------------------------------|-----------------------------------|-----------------------------------------------|
| <b>Window Analysis (Primary)</b>                             | 23                                    | 6913                              | $3.14 \times 10^{-7}$                         |
| <b>Window Analysis (Secondary)</b>                           | 23                                    | 1519                              | $1.433 \times 10^{-6}$                        |
| <b>Common CNV Analysis</b>                                   | 23                                    | 166                               | $1.31 \times 10^{-5}$                         |
| <b>Common Facial Variation SNP GWAS gene set (Primary)</b>   | 22                                    | 17                                | $1.34 \times 10^{-4}$                         |
| <b>Common Facial Variation SNP GWAS gene set (Secondary)</b> | 22                                    | 11                                | $2.01 \times 10^{-4}$                         |
| <b>Phenotypic GWAS gene set (Primary)</b>                    | 22                                    | 26                                | $8.74 \times 10^{-5}$                         |
| <b>Phenotypic GWAS gene set (Secondary)</b>                  | 22                                    | 26                                | $8.74 \times 10^{-5}$                         |

\*For one phenotype

**Table S7. CNV summary statistics**

|                           | <b>CNV Length</b> | <b>Loss Length</b> | <b>Gain Length</b> | <b>Total Number of CNVs per Person</b> | <b>Total Number of Losses per Person</b> | <b>Total Number of Gains per Person</b> | <b>Gain/Loss Ratio per Person*</b> |
|---------------------------|-------------------|--------------------|--------------------|----------------------------------------|------------------------------------------|-----------------------------------------|------------------------------------|
| <b>Minimum</b>            | 1001              | 1001               | 1001               | 18                                     | 15                                       | 0                                       | 0.006536                           |
| <b>Quantile 1</b>         | 4375              | 4088               | 8251               | 43                                     | 35                                       | 5                                       | 0.1111                             |
| <b>Median</b>             | 8904              | 7946               | 18680              | 50                                     | 41                                       | 8                                       | 0.1818                             |
| <b>Mean</b>               | 21600             | 16960              | 44310              | 63.88                                  | 53.05                                    | 10.83                                   | 0.2591                             |
| <b>Quantile 3</b>         | 20950             | 17100              | 45940              | 63                                     | 48                                       | 12                                      | 0.2745                             |
| <b>Maximum</b>            | 2741000           | 1753000            | 2741000            | 342                                    | 413                                      | 154                                     | 4.667                              |
| <b>Standard Deviation</b> | 45564.48          | 31301.84           | 82605.6            | 45.705                                 | 44.22                                    | 11.359                                  | 0.3122                             |

\*Subset of subjects with at least one gain

**Table S8. Top regions with CNVs <10 kb**

| <b>Region</b>                     | <b>Associated Phenotype</b>     | <b>Absent/<br/>Present<br/>All CNVs</b> | <b>Absent/Present<br/>CNVs &gt;10kb</b> | <b>Directional<br/>All CNVs</b> | <b>Directional<br/>CNVs<br/>&gt;10kb</b> | <b>All CNVs<br/>N loss; n gain<br/>(CNVs &gt;10kb:<br/>N loss; n gain)</b> |
|-----------------------------------|---------------------------------|-----------------------------------------|-----------------------------------------|---------------------------------|------------------------------------------|----------------------------------------------------------------------------|
| Chr18:<br>77147000-<br>77283000   | Head<br>Circumference           | $1.31 \times 10^{-3}$                   | $1.34 \times 10^{-3}$                   | $1.16 \times 10^{-6}$           | $2.41 \times 10^{-6}$                    | 73;12<br>(67; 12)                                                          |
|                                   | Lower Facial<br>Depth (average) | $1.03 \times 10^{-4}$                   | $1.67 \times 10^{-4}$                   | $7.03 \times 10^{-3}$           | $4.29 \times 10^{-3}$                    | 55;7<br>(53; 4)                                                            |
|                                   | Upper Lip<br>Height             | $3.47 \times 10^{-4}$                   | $1.14 \times 10^{-4}$                   | $5.80 \times 10^{-3}$           | $1.14 \times 10^{-3}$                    | 55;7<br>(53; 4)                                                            |
|                                   | PC1                             | $3.71 \times 10^{-4}$                   | $6.45 \times 10^{-4}$                   | $3.05 \times 10^{-2}$           | $3.00 \times 10^{-3}$                    | 55;7<br>(53; 4)                                                            |
| Chr10:<br>111034000-<br>111058000 | Upper Facial<br>Depth (average) | $2.64 \times 10^{-6}$                   | Too few CNVs                            | $2.64 \times 10^{-6}$           | Too few<br>CNVs                          | 13;0<br>(3;0)                                                              |
| Chr4:<br>3423000-<br>3538000      | Upper Facial<br>Depth – average | $5.20 \times 10^{-6}$                   | No small CNVs                           | $1.51 \times 10^{-1}$           | No small<br>CNVs                         | 41; 7<br>(41;7)                                                            |
|                                   | Midfacial Depth<br>(average)    | $4.79 \times 10^{-5}$                   |                                         | $2.21 \times 10^{-1}$           |                                          | 41; 7<br>(41;7)                                                            |
| Chr2:<br>34230000-<br>34324000    | Subnasal Width                  | $2.47 \times 10^{-5}$                   | $3.38 \times 10^{-5}$                   | $5.23 \times 10^{-6}$           | $7.03 \times 10^{-6}$                    | 19; 1<br>(18;1)                                                            |
|                                   | Nasal Width                     | $7.82 \times 10^{-5}$                   | $1.52 \times 10^{-4}$                   | $5.71 \times 10^{-5}$           | $1.11 \times 10^{-4}$                    | 19; 1<br>(18;1)                                                            |
|                                   | Mid-Face PC1                    | $6.63 \times 10^{-4}$                   | $7.16 \times 10^{-4}$                   | $4.65 \times 10^{-4}$           | $4.99 \times 10^{-4}$                    | 19; 1<br>(18;1)                                                            |
| Chr16:<br>1225000-<br>1508000     | Nasal Ala Length<br>– average   | $9.35 \times 10^{-6}$                   | No small CNVs                           | $6.26 \times 10^{-5}$           | No small<br>CNVs                         | 1; 9<br>(1;9)                                                              |
|                                   | Subnasal Width                  | $5.12 \times 10^{-5}$                   |                                         | $1.10 \times 10^{-4}$           |                                          | 1; 9<br>(1;9)                                                              |
|                                   | Nasal Width                     | $5.60 \times 10^{-5}$                   |                                         | $1.05 \times 10^{-4}$           |                                          | 1; 9<br>(1;9)                                                              |
|                                   | Midfacial Depth<br>(average)    | $2.85 \times 10^{-4}$                   |                                         | $3.32 \times 10^{-2}$           |                                          | 12; 7<br>(12;7)                                                            |

**Table S12. Primary analysis windows below p-value thresholds**

| <b>P-value<br/>Threshold</b>           | <b>Total</b> | <b>Directional model only</b> |         | <b>Both models</b> |         | <b>Absent/Present<br/>model only</b> |         |
|----------------------------------------|--------------|-------------------------------|---------|--------------------|---------|--------------------------------------|---------|
|                                        |              | N Windows                     | Percent | N Windows          | Percent | N Windows                            | Percent |
| <b><math>5.0 \times 10^{-2}</math></b> | 20758        | 7494                          | 36.1%   | 3761               | 18.1%   | 9503                                 | 45.8%   |
| <b><math>1.0 \times 10^{-2}</math></b> | 4726         | 1797                          | 38.0%   | 656                | 13.9%   | 2273                                 | 48.1%   |
| <b><math>1.0 \times 10^{-3}</math></b> | 580          | 215                           | 37.1%   | 76                 | 13.1%   | 289                                  | 49.8%   |
| <b><math>1.0 \times 10^{-4}</math></b> | 77           | 31                            | 40.3%   | 5                  | 6.5%    | 41                                   | 53.2%   |
| <b><math>1.0 \times 10^{-5}</math></b> | 7            | 4                             | 57.1%   | 0                  | 0.0%    | 3                                    | 42.9%   |
