# Supplementary material for: Genome-wide analysis of copy number variants and normal facial variation in a large cohort of Bantu Africans
Source: PubMed Central journal article supplement — HGG Adv. 2021 Dec 24;3(1):100082. doi: 10.1016/j.xhgg.2021.100082 (PMC8756499; doi:10.1016/j.xhgg.2021.100082), 2021-12-24
Supplement: mmc3.pdf [file mmc3.pdf]

# Genome-wide analysis of copy number variants and normal facial variation in a large cohort of Bantu Africans

Megan Null,<sup>1,2</sup> Feyza Yilmaz,<sup>3,4</sup> David Astling,<sup>5</sup> Hung-Chun Yu,<sup>3</sup> Joanne B. Cole,<sup>3,6</sup> Benedikt Hallgrímsson,<sup>7</sup> Stephanie A. Santorico,<sup>1,6,8</sup> Richard A. Spritz,<sup>3,6</sup> Tamim H. Shaikh,<sup>3,6,\*</sup> and Audrey E. Hendricks<sup>1,6,8,\*</sup>

## Abstract

Similarity in facial characteristics between relatives suggests a strong genetic component underlies facial variation. While there have been numerous studies of the genetics of facial abnormalities and, more recently, single nucleotide polymorphism (SNP) genome-wide association studies (GWASs) of normal facial variation, little is known about the role of genetic structural variation in determining facial shape. In a sample of Bantu African children, we found that only 9% of common copy number variants (CNVs) and 10-kb CNV analysis windows are well tagged by SNPs ( $r^2 \geq 0.8$ ), indicating that associations with our internally called CNVs were not captured by previous SNP-based GWASs. Here, we present a GWAS and gene set analysis of the relationship between normal facial variation and CNVs in a sample of Bantu African children. We report the top five regions, which had  $p$  values  $\leq 9.35 \times 10^{-6}$  and find nominal evidence of independent CNV association ( $p < 0.05$ ) in three regions previously identified in SNP-based GWASs. The CNV region with strongest association ( $p = 1.16 \times 10^{-6}$ , 55 losses and seven gains) contains *NFATC1*, which has been linked to facial morphogenesis and Cherubism, a syndrome involving abnormal lower facial development. Genomic loss in the region is associated with smaller average lower facial depth. Importantly, new loci identified here were not identified in a SNP-based GWAS, suggesting that CNVs are likely involved in determining facial shape variation. Given the plethora of SNP-based GWASs, calling CNVs from existing data may be a relatively inexpensive way to aid in the study of complex traits.

## Introduction

The human face is one of the most visually distinguishable human features. Similarity of facial characteristics within families suggests a strong genetic component in normal facial development. While single nucleotide polymorphism (SNP)-based studies have uncovered many associations with face shape,<sup>1–3</sup> the genetics behind normal facial variation is not well understood. Particularly little is known about the role of copy number variants (CNVs). Previous studies of the sample of Bantu African children studied here have shown that facial shape measures have considerable narrow sense heritability (28%–67% for 32 of 33 facial measurements).<sup>4</sup> Cole et al.<sup>4</sup> found that much of this heritability is explained by common (minor allele frequency, MAF > 1%) SNPs; nevertheless, for a number of facial phenotype measures, a considerable fraction (26%–64%) of estimated heritability is not explained by common SNPs. We hypothesize that some of this *missing heritability* may reflect genomic structural variation (SV), especially CNVs that may cause dosage imbalance of genes involved in facial development.

Recent studies in large cohorts have shown that CNVs represent a substantial source of human genetic variation,<sup>5</sup> altogether involving 4.8%–9.5% of the genome.<sup>6</sup> CNVs have been associated with several common complex diseases and traits, such as schizophrenia<sup>7</sup> (MIM: 181500), autism spectrum disorder<sup>8</sup> (MIM: 209850), and height<sup>9</sup> (MIM: 606255). Additionally, CNVs have been associated with a number of rare diseases, including several in which patients have craniofacial abnormalities, such as 22q11 deletion syndrome<sup>10</sup> (MIM: 192430) and Angelman syndrome<sup>11</sup> (MIM: 105830).

While recent research has provided insights into SVs, including CNVs, across the genome and in multiple genetic ancestries,<sup>12</sup> the role of CNVs in complex traits remains understudied, particularly in non-European ancestral populations.<sup>12–14</sup> Studying CNVs in non-European populations is important, as CNVs and especially rare CNVs may be population specific or differ greatly in frequency.<sup>12,15,16</sup> Additionally, the linkage disequilibrium (LD) structure between SNPs and CNVs differs by ancestral population.<sup>12</sup>

CNV calling and subsequent genome-wide association analysis are both computationally and time intensive; if

<sup>1</sup>Mathematical and Statistical Sciences, University of Colorado Denver, Denver, CO, USA; <sup>2</sup>Department of Mathematics and Physical Sciences, The College of Idaho, Caldwell, ID 83605, USA; <sup>3</sup>Department of Pediatrics, University of Colorado Anschutz Medical Campus, Aurora, CO 80045, USA; <sup>4</sup>Department of Integrative Biology, University of Colorado Denver, Denver, CO 80204, USA; <sup>5</sup>Department of Biochemistry and Molecular Genetics, University of Colorado Anschutz Medical Campus, Aurora, CO 80045, USA; <sup>6</sup>Human Medical Genetics and Genomics Program, University of Colorado Anschutz Medical Campus, Aurora, CO 80045, USA; <sup>7</sup>Department of Cell Biology & Anatomy, Alberta Children Hospital Research Institute, Cumming School of Medicine, University of Calgary, Calgary, Alberta T2N 1N4, Canada; <sup>8</sup>Biostatistics and Informatics, Colorado School of Public Health, Aurora, CO 80045, USA

\*Correspondence: [tamim.shaikh@cuanschutz.edu](mailto:tamim.shaikh@cuanschutz.edu) (T.H.S.), [audrey.hendricks@ucdenver.edu](mailto:audrey.hendricks@ucdenver.edu) (A.E.H.)

<https://doi.org/10.1016/j.xhgg.2021.100082>

© 2021 The Authors. This is an open access article under the CC BY-NC-ND license (<http://creativecommons.org/licenses/by-nc-nd/4.0/>).

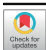

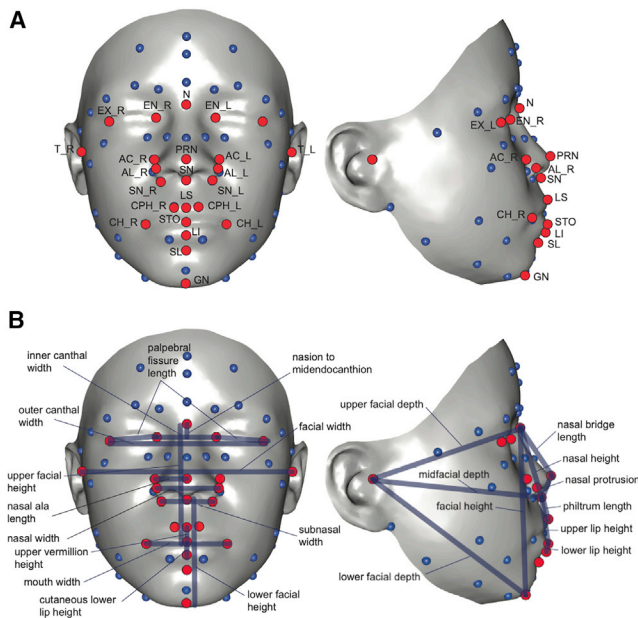

**Figure 1.** Three dimensional photographs with annotated landmarks. (A) 3D landmarks used for geometric morphometric quantification of facial shape as previously described.<sup>1</sup> The full landmark set was used to calculate the shape variables (PCs and allometry) as well as facial size (centroid size). The red landmarks are those used to obtain specific interlandmark distances for analysis. (B) The full set of distances used (Table S1).

CNVs are tagged well by SNPs, additional CNV calling and analysis may be unnecessary. The Wellcome Trust Case Control Consortium found that SNP-based analyses captured common CNVs (MAF > 10%) through high LD ( $r^2 > 0.8$ ) with SNPs in a large ( $n = 16,000$ ) European sample.<sup>17</sup> However, only 22% of less common CNVs (MAF < 5%) were well tagged by SNPs. More recently, Collins et al.<sup>12</sup> reported lower LD between SNPs and SVs in an African/African American sample compared to other ancestries.

Here, we describe a CNV GWAS and gene set analysis of the relationship between rare and common CNVs and normal facial variation in a sample of 3,388 apparently healthy Bantu African children from Tanzania. We calculated pairwise LD between CNVs and SNPs within 1 megabase (mb) of the CNV to evaluate whether the previous SNP-based GWAS in this sample<sup>1</sup> likely captured common and rare CNVs. Within the CNV GWAS, we identify five genomic regions associated with a facial phenotype and nominal CNV associations in three regions that were previously identified by the SNP-based GWAS. Pairwise LD between SNPs and CNVs in these eight regions is low (maximum pairwise  $r^2 < 0.3$ ), further supporting independent and novel associations beyond that of the SNP-based GWAS in African subjects.

## Subjects and Methods

### Subjects

The study cohort presented here was previously described in detail by Cole et al.<sup>1</sup> Briefly, it consisted of 3,631 Bantu

African children aged 3–21 from the Mwanza region of Tanzania. Children with abnormal facial features or a relative with known facial abnormalities were excluded. Written informed consent was obtained for all study subjects or their parents, as appropriate. The original SNP GWAS and sample collection was carried out with overall approval and oversight of the Colorado Multiple Institutional Review Board (protocol #09–0731), was additionally approved by the institutional review boards of the University of Calgary, Florida State University, the University of California San Francisco, and the Catholic University of Health and Allied Sciences (Mwanza, Tanzania), and was carried out with the approval of the National Institute for Medical Research (Tanzania). While subjects were apparently unrelated upon data collection, quality control discovered considerable cryptic relatedness within the sample.<sup>1</sup> As described below and within Cole et al.,<sup>1</sup> this relatedness is accounted for by including a kinship matrix in our model.

### Phenotype data

To quantify facial variation, each child was photographed using a 3D camera, as seen in Figure 1. Twenty-nine standard facial morphometric landmarks were extracted, and from these coordinates, twenty-five inter-landmark linear distances, three measures of overall face size (i.e. allometry, centroid size, and head circumference), one summary variable from a principal components analysis (PCA) of the most highly correlated midfacial landmarks (explaining approximately 40% of total midface variation), and five summary variables from a PCA of the whole face (explaining approximately 70% of total facial variation) were derived (Table S1).<sup>1</sup> Shape variation associated with size (allometry) was removed by multiple-multivariate regression prior to PCA. Head circumference was measured using a tape measure in 2,686 subjects. This resulted in 34 traits for analysis. See Cole et al.<sup>1</sup> for more details.

### Variant calling and quality control

A flowchart of CNV calling and analysis is depicted in Figure 2. Saliva DNA from each subject was genotyped using the HumanOmni2.5Exome array (approximately markers).<sup>1</sup> Three CNV calling algorithms were used to call CNVs across autosomes: PennCNV<sup>18</sup> (version 1.0.1), DNACopy<sup>19</sup> (version 1.46.0), and VanillaICE<sup>20</sup> (version 1.32.2). CNVs were defined as segments of loss or gain >1000 base pair (bp). The scripts used to run the CNV calling algorithms are available (data and code availability). CNV calling results were filtered as described previously.<sup>41</sup> In PennCNV, CNV calling from genotype data using high-density SNP arrays can result in artificial splitting of larger CNVs (approximately >500 kilobase [kb]) into multiple smaller CNVs.<sup>18</sup> Thus, adjacent CNVs of the same type (i.e., both loss or both gain) and called in at least two algorithms were merged using the approach of Wang et al.<sup>18</sup> Briefly, for three adjacent genomic regions A, B, and C, where A and C represent two CNVs of the same

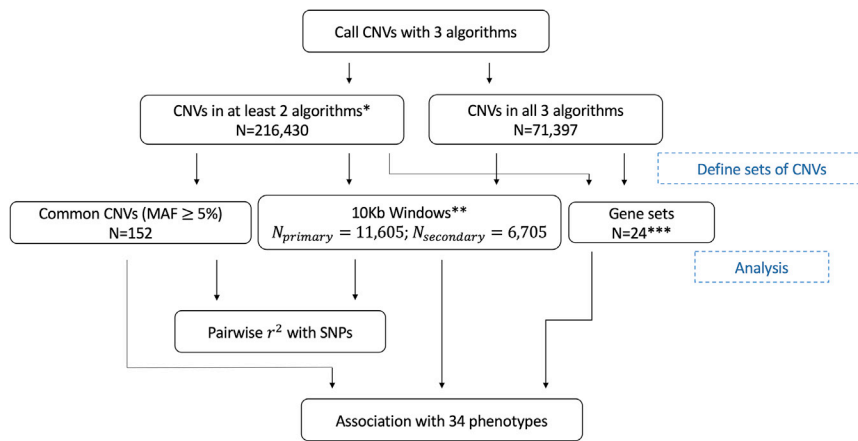

**Figure 2. Analysis flowchart.** Flow chart describing the analysis process. \*CNVs called in at least two algorithms with  $\geq 10\%$  overlap with CNVs called in all three algorithms; \*\*10-Kb tiling windows with a 3-Kb overlap; \*\*\* 15 gene sets from FaceBase phenotype groups and three gene sets from SNP GWAS of normal facial variation.

type separated by region B, CNVs A and C were merged if  $\frac{B}{A+B+C} \leq 0.15$ .

After variant calling, we performed subject and CNV quality control (QC) to identify and remove subjects and CNV calls with low confidence. We removed 70 duplicate subjects and 97 subjects with a total CNV count greater than three standard deviations above the cohort mean. CNV QC was then performed to identify and remove low-quality or low-confidence CNV calls. We removed CNVs with fewer than five array probes, any centromere or telomere overlap, more than 50% overlap with a segmental duplication, a PennCNV score  $\leq 10$ , or a DNA-copy log ratio outside the range  $(-0.1, 0.1)$ . Restricting to the set of CNVs called in all three algorithms, one additional subject with a total CNV count greater than three standard deviations above the cohort mean was excluded. A high gain-to-loss ratio is indicative of poor quality of CNVs. No subjects had a gain to loss ratio greater than the predefined ratio of four, resulting in no subjects being removed. One subject with no CNVs remaining after CNV QC was removed from the sample. Thus, 3,462 samples passed CNV QC. An additional 74 subjects were removed for not passing phenotype QC, performed by Cole et al.<sup>1</sup> The final sample size was 3,388 subjects. The number of subjects with non-missing values for each phenotype is reported in Table S2.

### Definition of CNV windows, regions, and common variants

For association analyses, we used internally derived CNVs that were called in at least two algorithms and had at least 10% overlap with a CNV called in all three algorithms (primary;  $n = 216,430$  CNV alleles) or were called in all three algorithms (secondary;  $n = 71,397$  CNV alleles). The *intersect* command in BEDTools<sup>21</sup> was used to identify CNVs that had at least 10% overlap.

CNV tiling windows were defined across the genome as 10-kb regions with a 3-kb overlap. A CNV was included in a window if at least 1 bp of the CNV overlapped the window. Windows with a minimum of ten subjects with a CNV were taken forward for analysis ( $n = 11,605$  primary

analysis windows,  $n = 6,705$  secondary analysis windows). Regions were defined as sets of overlapping analysis windows. This resulted in 1,948 primary analysis regions and 988 secondary analysis regions. Common

CNVs were defined as a subset of primary analysis CNVs that had the same start and end location and were seen in at least 5% of the sample (170 subjects).

We define *CNV sites* as called CNVs with the same start and end location, and *CNV alleles* as the number of observed CNVs in our cohort at each CNV site. A CNV site seen in multiple subjects will have more than one CNV allele, whereas a CNV site only observed in a single subject will have one CNV allele.

### Genome-wide association

Subjects were assigned values for each CNV window using two classification functions: (1) *absent/present*: each subject was assigned a value of 0 or 1 for the absence or presence of a CNV, respectively, and (2) *directional*: each subject was assigned a value of 0 for a loss, 1 for no CNV, or 2 for a gain. Subjects with both a loss and gain in the same window were coded as 1 (i.e., no CNV) in the *directional* model and as 1 in the *absent/present* model. Eighty-two primary analysis windows had at least one subject with both a loss and a gain in non-overlapping portions of the window. Windows with at least ten subjects with phenotype information and a CNV overlapping the window were taken forward for association analysis. Common CNVs were analyzed individually and within the window analysis. For common CNVs, each subject received a 0 or 1 for the absence or presence of the CNV, respectively, in the *absent/present* model. In the *directional* model, each subject was assigned a 0, 1, or 2 for a loss, no CNV, or gain for each common CNV of interest.

For all association models, we implemented linear mixed effects regression using Efficient Mixed-Model Association eXpedited<sup>22</sup> (EMMAX) via the EPACTS toolbox with default parameters. The kinship matrix was estimated in EMMAX separately for each chromosome using SNPs from all other chromosomes<sup>1</sup> (i.e., a leave-one-out strategy) and was used to adjust for relatedness. Additionally, we adjusted for sex, age, and centroid size as described previously.<sup>1</sup> Quantile-quantile (QQ) plots were created to assess whether there was bias due to unaccounted for population structure or other confounders. Due to high

**Table 1. Top CNV regions associated with facial phenotypes**

| Region (hg19)                | Win (n) | Associated phenotype <sup>b</sup> | Minimum p value <sup>a</sup> |                         | Loss (n); gain (n) <sup>a</sup> | Overlapping genes                                                                                       | r <sup>2c</sup> |
|------------------------------|---------|-----------------------------------|------------------------------|-------------------------|---------------------------------|---------------------------------------------------------------------------------------------------------|-----------------|
|                              |         |                                   | Absent/present               | Directional             |                                 |                                                                                                         |                 |
| Chr18: 77,147,000–77283000   | 19      | head circumference                | 1.31 × 10 <sup>-3</sup>      | 1.16 × 10 <sup>-6</sup> | 73; 12                          | <i>NFATC1</i>                                                                                           | 0.035           |
|                              |         | lower facial depth (average)      | 1.03 × 10 <sup>-4</sup>      | 7.03 × 10 <sup>-3</sup> | 55; 7                           |                                                                                                         |                 |
|                              |         | upper lip height                  | 3.47 × 10 <sup>-4</sup>      | 5.80 × 10 <sup>-3</sup> | 55; 7                           |                                                                                                         |                 |
|                              |         | PC1                               | 3.71 × 10 <sup>-4</sup>      | 3.05 × 10 <sup>-2</sup> | 55; 7                           |                                                                                                         |                 |
| Chr10: 111,034,000–111058000 | 3       | upper facial depth (average)      | 2.64 × 10 <sup>-4</sup>      | 2.64 × 10 <sup>-6</sup> | 13; 0                           |                                                                                                         | 0.040           |
| Chr4: 3,423,000–3538000      | 16      | upper facial depth (average)      | 5.20 × 10 <sup>-6</sup>      | 1.51 × 10 <sup>-1</sup> | 41; 7                           | <i>DOK7, LRPAP1, HGFAC, RGS12</i>                                                                       | 0.028           |
|                              |         | midfacial depth (average)         | 4.79 × 10 <sup>-5</sup>      | 2.21 × 10 <sup>-1</sup> | 41; 7                           |                                                                                                         |                 |
| Chr2: 34,230,000–34324000    | 13      | subnasal width                    | 2.47 × 10 <sup>-5</sup>      | 5.23 × 10 <sup>-6</sup> | 19; 1                           | <i>LINC01317, LINC01318</i>                                                                             | 0.063           |
|                              |         | nasal width                       | 7.82 × 10 <sup>-5</sup>      | 5.71 × 10 <sup>-5</sup> | 19; 1                           |                                                                                                         |                 |
|                              |         | midface PC1                       | 6.63 × 10 <sup>-4</sup>      | 4.65 × 10 <sup>-4</sup> | 19; 1                           |                                                                                                         |                 |
| Chr16: 1,225,000–1508000     | 40      | nasal ala length (average)        | 9.35 × 10 <sup>-6</sup>      | 6.26 × 10 <sup>-5</sup> | 1; 9                            | <i>TPSAB1, TPSD1, TPSB2, TPSG1, CACNA1H, UBE2I, BAIAP3, GNPTG, TSR3, UNKL, C16orf91, CCDC154, CLCN7</i> | 0.100           |
|                              |         | subnasal width                    | 5.12 × 10 <sup>-5</sup>      | 1.10 × 10 <sup>-4</sup> | 1; 9                            |                                                                                                         |                 |
|                              |         | nasal width                       | 5.60 × 10 <sup>-5</sup>      | 1.05 × 10 <sup>-4</sup> | 1; 9                            |                                                                                                         |                 |
|                              |         | midfacial depth (average)         | 2.85 × 10 <sup>-4</sup>      | 3.32 × 10 <sup>-2</sup> | 12; 7                           |                                                                                                         |                 |

<sup>a</sup>Reported for the window with lowest p value in the region. Details from each window in the region, as well as genes within a 10-kb flanking region are in Table S8.

<sup>b</sup>Associated phenotypes with minimum region p value < 5 × 10<sup>-4</sup> in at least one model are reported.

<sup>c</sup>Maximum pairwise r<sup>2</sup> between SNP and CNV window in the region is reported.

correlation between overlapping analysis windows within a region, a random window from each region was selected for the QQ plots. To ensure that the top five signals were not driven by small CNVs, which are more likely to be false positives, we performed a sensitivity analysis by restricting CNVs within the region to those >10 kb. Windows with at least 10 subjects with a CNV >10 kb in the window were evaluated.

Gene annotation was performed using GENCODE,<sup>23</sup> release 31 (GRCH37). Gene annotation in figures was created using the UCSC Genome Browser.<sup>24</sup>

#### Association of CNVs in regions previously identified by SNP-based GWAS

We examined the associated and replicated genetic loci reported in three SNP-based GWASs of normal facial variation: (1) the same sample of Bantu African children studied here from Cole et al.,<sup>1</sup> (2) a sample of children and adults with European ancestries from Claes et al.,<sup>2</sup> and (3) four cohorts of children and adults with European ancestries from the United States (three cohorts) and United Kingdom (one cohort) examined within a meta-analysis framework by White et al.<sup>3</sup> (Table S3). From Cole et al.,<sup>1</sup> we investigated the 11 associated and replicated gene regions, as reported by Cole et al. in Table 2 of their manuscript. From Claes et al.,<sup>2</sup> we investigated 14 loci (containing 25 genes) that were associated and replicated, as reported by Claes et al. in Table 1<sup>2</sup> of their manuscript. From White et al.,<sup>3</sup> we investigated the 120 loci with consistent genetic effects between the US and UK meta-analyses and passed study-wise significance threshold, as reported in Table S3 of their

manuscript. Additional details about the studies, including how replication was defined, are reported in each manuscript.<sup>1–3</sup> We examined windows directly overlapping and within a 50-kb flanking region around the reported genetic region. Here, we report nominally significant CNV windows (i.e., p < 0.05). If the CNV window and SNP were both nominally associated with the same phenotype in our Bantu sample, we performed conditional analysis by including the reported GWAS SNP as a covariate in the CNV window analysis model.

#### Gene set analysis

We completed gene set analysis using two primary sources: (1) three gene sets from normal facial variation SNP-based GWAS loci reported in Bantu<sup>1</sup> and two European<sup>2,3</sup> ancestry groups (Table S3) and (2) 15 gene sets, each corresponding to a phenotype category, from the FaceBase consortium<sup>25</sup> (Table S4). The FaceBase gene sets were generated by manual curation of genes associated with abnormal craniofacial phenotypes observed in human subjects. Gene regions from normal facial variation SNP-based GWASs were assessed for each of the three studies. The 11 genes from the Bantu study<sup>1</sup> were analyzed as a gene set, as were the 26 genes from the smaller European study.<sup>2</sup> The 108 genes from the European meta-analysis gene set<sup>3</sup> were divided into seven gene sets. The reported genes were annotated with the region of the face with the strongest association in White et al.<sup>3</sup> The regions defining the seven gene sets, seen in Figure 1 of White et al.,<sup>3</sup> are as follows: (1) the full face (n = 11), which separates into (2) Segment 2, the midface (n = 14), and (3)

Segment 3, the rest of the face ( $n = 3$ ). Segment 2 was further divided into (4) Quadrant 1, the region of the mouth ( $n = 14$ ), and (5) Quadrant 2, the region of the nose ( $n = 29$ ). Likewise, Segment 3 was further divided into (6) Quadrant 3, the lower facial area ( $n = 21$ ), and (7) Quadrant 4, the upper facial area ( $n = 27$ ). Eleven of the 108 genes were associated with multiple phenotypic regions and thus in multiple gene sets.

Gene set analysis was completed for both the primary (called in at least two algorithms) and secondary (called in all three algorithms) CNV calling sets using CNVs overlapping a gene (i.e., at least 1 bp) and for CNVs overlapping a  $\pm 50$ -kb flanking region of a gene set. This resulted in four analyses within each of the gene sets described above. Each subject was coded as 1 for at least one CNV in the gene set and 0 for no CNVs in the gene set. Gene sets with at least ten CNVs were analyzed. Association analyses were performed using EMMAX<sup>22</sup> as described for the window analysis.

### Linkage disequilibrium between SNPs and CNVs

We estimated pairwise  $r^2$  between SNPs and common CNVs as well as between SNPs and CNV windows. CNV windows with CNVs called in all three algorithms and the *absent/present* coding were used. As reported and described in Cole et al.,<sup>1</sup> SNPs were imputed using SHAPEIT2 and IMPUTE2 software to 1000 Genomes Project Phase 1 data. We estimated pairwise  $r^2$  using the method of Mangin et al.<sup>26</sup> that adjusts for relatedness. We calculated  $r^2$  between the CNVs called here (i.e., common CNVs and CNV windows that include common and rare CNVs) and each SNP within  $\pm 1$  mb of the common CNV or window. The SNP with the largest  $r^2$  value was reported as the tag SNP for the common CNV, window, or region. A CNV window or common CNV was considered well tagged if the tag SNP had  $r^2 \geq 0.8$ .

To evaluate the differences in LD between CNV windows that had more loss versus gain CNVs, we ran a linear mixed effects model using a dummy variable for more gains in the window and the region (as a random effect) to predict  $r^2$ . Only CNV analysis windows with unequal numbers of loss and gain CNVs were included ( $n = 6,621$ ).

### Significance threshold

For each analysis, we applied a Bonferroni correction for the effective number of independent tests with a family-wise error rate (FWER) significance level of  $p < 0.05$ . The Bonferroni correction can be overly conservative, particularly given our correlation in both phenotypes and windows. Using the effective number of tests corrects for multiple testing without being overly conservative. The effective numbers of independent tests and phenotypes were estimated using the method of Gao et al.,<sup>27</sup> estimated separately for each chromosome to ensure more subjects than windows. We calculated 23 effectively independent phenotypes, and the effective number of independent tests for each analysis is shown in Table S5. For the primary

window analysis, 6,913 effectively independent tests were estimated resulting in an FWER significance threshold  $p = \frac{0.05}{6.193 \times 23} = 3.14 \times 10^{-7}$ .

## Results

### CNV calling and quality control

We observed 57,142 CNV sites called within our sample with a total of 216,430 CNV alleles across all autosomes (subjects and methods). Of the CNV alleles, 179,729 were losses and 36,701 were gains. About one-third of CNV sites were observed in more than one subject ( $n = 19,355$ ; 33.9%) and two-thirds were limited to one subject ( $n = 37,787$ ; 66.1%). The 19,355 CNV sites found in multiple subjects produced the majority of CNV alleles ( $n = 178,643$ ; 82.5%). The vast majority of the 57,142 CNV sites were rare ( $MAF \leq 5\%$ ,  $n = 56,990$ , 99.73%) with only 152 common CNV sites ( $MAF > 5\%$ , 0.27%). The subset of CNVs called by all three algorithms used in the secondary analysis included 14,181 CNV sites and a total of 71,397 CNV alleles. A complete list of CNV sites and allele counts is in Table S6. Many of the CNVs are near each other, sometimes sharing either the start and/or end with another CNV site (e.g., Figure 3C). The variability in start and end sites may reflect lack of precision in the CNV calls or true biological sample to sample variability.

For the 3,388 subjects that passed QC, the mean and median number of CNVs called per person was 63.88 (SE = 0.79) and 50, respectively, with a minimum of 18 and a maximum of 432. For subjects with at least one gain, the mean gain-to-loss ratio was 0.259. All samples had at least one loss; six subjects did not have a gain. The maximum CNV length detected was 2,741 kb, with a mean length of 21.6 kb (SE = 97.9 bp). Complete CNV summary statistics are in Table S7.

### CNV analysis windows and regions

Like rare single nucleotide variants (SNVs), rare CNVs cannot be assessed for association individually due to having too few rare alleles. Thus, we use 10-kb tiling windows with a 3-kb overlap to capture CNVs within a genetic region. The window analysis did not contain all CNVs; 11,592 CNV alleles (5.4%) across 7,761 sites (13.6%) were not included in an analysis window due to the minimum requirement of ten CNVs per window. Within the secondary analysis, 6,710 CNV alleles (9.4%) across 4,508 CNV sites (31.8%) were not included in an analysis window.

Of the 11,605 primary analysis windows, 3,525 (30.4%) contained only losses, 1,472 (12.7%) contained only gains, and 6,608 (56.9%) contained both gains and losses. Interestingly, the distribution of the secondary analysis windows was considerably different with an increased proportion of only losses ( $n = 2,735$ , 40.8%) and only gains ( $n = 1,703$ , 25.4%) and fewer analysis windows containing both gains and losses ( $n = 2,267$ , 33.8%). These results show that many of the opposite CNV type (i.e., gains

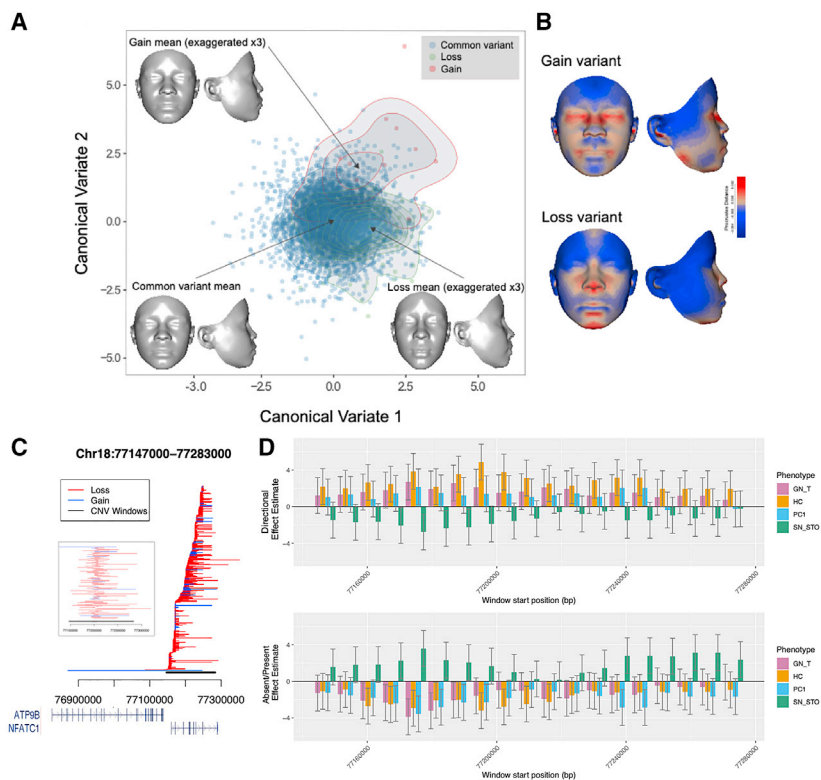

**Figure 3. Region plot, chromosome 18.** (A) A canonical variates plot for facial shape variation by CNV variant. The 3D morphs show the mean face for the common variant (no CNV) as well as exaggerated shape contrasts ( $\times 3$ ) for the loss and gain variants. (B) Heatmaps for the shape contrasts between the common variant and each of the CNV variants. (C) Loss (red) and gain (blue) CNVs. Each line represents a unique CNV allele from one subject with the genes in the region shown below. A zoom plot of the subset of CNVs overlapping the window with the lowest p value is also shown. The CNV analysis region is shown in black. (D) Test statistic t values (effect estimate/standard error of effect estimate) across the region with 95% confidence intervals in the *directional* model (top) and *absent/present* model (bottom). Phenotypes with at least one window with p value  $< 5 \times 10^{-4}$  are shown: lower facial depth (GN\_T), head circumference (HC), principal component 1: upper facial height and mid facial width (PC1), and upper lip height (SN\_STO).

and losses) called near one another are not likely to be called with all three CNV calling algorithms. This may be due to differences in the CNV algorithms' ability to call both losses and gains in the same region or due to biological differences in the likelihood of gains and losses being in the same region.

### Genome-wide association

In the window association analysis between the primary CNV windows and the 34 facial measurements, no windows passed the multiple testing corrected threshold of  $p = 3.14 \times 10^{-7}$ . We report the top five regions, which had p values  $\leq 9.35 \times 10^{-6}$  (Table 1). The QQ plots show well-controlled test statistic distributions for each phenotype (Figures S1, S2, S3, and S4). The median  $\lambda$  values over all phenotypes were 1.002 and 1.028 for the *absent/present* and *directional* models, respectively. The most significant CNV association is from a 136-kb CNV region on chromosome 18 (Figure 3). This region contains 19 CNV analysis windows and 466 overlapping CNVs consisting of 412 losses and 54 gains. All but one CNV are between 1 kb and 376 kb in size, with 222 CNVs  $< 10$  kb (Figure 3C). However, the window that is most associated within the region contains 73 losses and 12 gains, with 6 loss CNVs  $< 10$  kb, as seen within the zoom plot of Figure 3C. Notably, the p value only slightly increased from  $p = 1.16 \times 10^{-6}$  to  $p = 2.41 \times 10^{-6}$  when restricting to CNVs  $> 10$  kb (Table S8). *NFATC1* (MIM: 600489) is the only gene to overlap this CNV region, although *ATP9B* (MIM: 614446) is just outside the CNV region and overlaps

two CNVs, including one long CNV ( $> 376$  kb). The association appears to be driven by losses, with a loss in the region associated with smaller average lower facial depth (Figures 3A and 3B). The four remaining regions are summarized in Figures S5–S8 and Table S8. Within these four regions, two of the driving windows (i.e., window with the lowest p value) contained no small CNVs (i.e., all CNVs  $> 10$  kb), and another region had only one CNV  $< 10$  kb in the top window. Only the region on chromosome 10 appeared to be driven by CNVs  $< 10$  kb, as ten of the 13 CNVs were  $< 10$  kb. Genome-wide results with p values  $< 0.1$  are in Table S9 with complete results available online (data and code availability).

For the secondary analysis, one window (chr5: 46,130,000–46,140,000,  $p_{\text{present/absent}} = 9.70 \times 10^{-7}$ ) within an intergenic region passed the multiple testing correction threshold ( $p < 1.43 \times 10^{-6}$ ). This region contains 66 CNV analysis windows and 588 overlapping CNV alleles across 117 CNV sites consisting of 537 losses and 51 gains. There are no genes within 250 kb of the CNV region, and the region is relatively close to a centromere (within 73 kb). Additionally, two of the top five regions in the primary analysis (chromosome 10 and chromosome 2) are also in the top five signals for the secondary analysis. Complete results for the secondary window model are in Table S10.

No common CNVs passed the multiple testing correction of  $p < 1.31 \times 10^{-5}$ . The most significant association was between PC1 and the common CNV chr5: 17,466,056–17,469,290 ( $p_{\text{both models}} = 2.04 \times 10^{-4}$ ). None of the five

**Table 2. CNV associations in gene regions previously identified by SNP GWAS**

| SNP GWAS                    | Gene          | Association  | Phenotype                  | p value <sup>a</sup>           | p value (SNP study)   | With SNP <sup>b</sup>  |        |
|-----------------------------|---------------|--------------|----------------------------|--------------------------------|-----------------------|------------------------|--------|
| Cole et al. <sup>1,4</sup>  | <i>DPP6</i>   | reported SNP | rs114189713                | mouth width                    | $7.26 \times 10^{-8}$ | $1.87 \times 10^{-7}$  | 0.067  |
|                             |               | CNV region   | 7: 153,860,000–153,870,000 | lower lip height               | $2.93 \times 10^{-3}$ |                        |        |
|                             |               |              |                            | lower facial depth (average)   | $1.78 \times 10^{-2}$ |                        |        |
| Claes et al. <sup>2</sup>   | <i>HOXD@</i>  | Reported SNP | rs970797                   | nose width; mouth and philtrum | $5.47 \times 10^{-1}$ | $6.17 \times 10^{-11}$ | 0.254  |
|                             |               | CNV region   | 2: 176,918,000–176,977,000 | head circumference             | $1.93 \times 10^{-3}$ |                        |        |
|                             |               |              |                            | lower facial height            | $4.64 \times 10^{-3}$ |                        |        |
|                             |               |              |                            | nasal width                    | $7.58 \times 10^{-3}$ |                        |        |
|                             |               |              |                            | inner canthal width            | $9.02 \times 10^{-3}$ |                        |        |
|                             |               |              |                            | PC5                            | $2.45 \times 10^{-2}$ |                        |        |
| White et al. <sup>3,c</sup> | <i>FGFRL1</i> | Reported SNP | rs74921869                 | quadrant 2: region of the nose | $8.95 \times 10^{-1}$ | $3.51 \times 10^{-11}$ | 0.0002 |
|                             |               | CNV region   | 4: 931,000–1,060,000       | centroid size                  | $2.20 \times 10^{-2}$ |                        |        |
|                             |               |              |                            | PC5                            | $3.87 \times 10^{-2}$ |                        |        |
|                             |               |              |                            | philtrum length                | $2.44 \times 10^{-2}$ |                        |        |
|                             |               |              |                            | nasal width                    | $3.89 \times 10^{-2}$ |                        |        |

<sup>a</sup>p value calculated with our sample. Due to CNV QC, our sample is slightly different than that of Cole et al.

<sup>b</sup>Maximum SNP-window pairwise  $r^2$  within the region for the reported SNP.

<sup>c</sup>Analysis windows with p values < 0.05 reported. Other two were reported for  $<2.5 \times 10^{-2}$ .

most significant regions identified in the primary window analysis contained common CNVs. Complete results for the common CNV analysis are in [Table S11](#).

### Association in regions previously identified in SNP-based GWASs

We examined the top reported results from three SNP-based GWASs of normal facial variation for association with CNVs. Of the 145 genes reported by Cole et al.<sup>1</sup>, Claes et al.<sup>2</sup> and White et al.<sup>3</sup> five gene regions—*DPP6* (MIM: 126141), the homeobox D cluster (*HOXD@*, *FGFRL1* (MIM: 605830), *ELP1* (MIM: 603722), and *SHBG* (MIM: 182205)—directly overlapped primary analysis windows with nominal association ( $p < 0.05$ ). However, *ELP1* and *SHBG* came from phenotypic gene sets that did not contain the phenotype the CNV window was associated with. [Table 2](#) summarizes facial phenotype associations for these three SNP-based GWAS gene regions.

In the SNP-based GWAS for facial variation in the same sample of Bantu Africans that we use here, Cole et al.<sup>1</sup> found that *DPP6* was associated with mouth width (rs114189713; Cole et al. replication meta-analysis  $p = 8.35 \times 10^{-8}$ ). In our CNV GWAS, we found the top associated CNV window (chr7: 153,860,000–153,870,000) to be most strongly associated with lower lip height ( $p_{\text{both models}} = 2.93 \times 10^{-3}$ ; 16 losses and 0 gains) ([Figure S9](#)). The SNP was not associated with lower lip height in our sample of 3,388 subjects ( $p = 0.769$ ), nor did we observe a significant association between a CNV window in the *DPP6* region and mouth width (minimum  $p = 0.212$ ). There was low LD between the CNV re-

gion and rs114189713 (maximum  $r^2 = 0.067$ ), indicating that the SNP and CNV associations are likely to be independent.

We observed nominally significant associations for CNV windows overlapping the *HOXD@* on chromosome 2, previously associated with nose width, and mouth and philtrum by Claes et al.<sup>2</sup> (reported from Claes et al. rs970797; discovery p value =  $6.17 \times 10^{-11}$ ) ([Figure S10](#)). For our CNV analysis, the *HOXD@* had strongest association with head circumference ( $p_{\text{absent/present}} = 1.90 \times 10^{-3}$ ), lower facial height ( $p_{\text{absent/present}} = 4.64 \times 10^{-3}$ ), and nasal width ( $p_{\text{absent/present}} = 7.58 \times 10^{-3}$ ). In our sample, we observed low LD between the *HOXD@* CNV region and the reported SNP from Claes et al. (rs970797, maximum  $r^2 = 0.254$ ), and the SNP identified in Claes et al.<sup>2</sup> (rs970797) was not associated with head circumference ( $p = 0.252$ ), lower facial height ( $p = 0.875$ ), or nasal width ( $p = 0.547$ ). The lack of replication for rs970797 may be due to true lack of association or differences in LD between Bantu and European ancestries.

In the SNP-based meta-analysis for normal facial variation White et al.<sup>3</sup> found that *FGFRL1* was associated with the region of the nose ( $p = 3.51 \times 10^{-11}$ ; US meta-analysis). Our CNV window analysis had nominal associations with PC5 (nose shape, height of mouth,  $p = 0.039$ , *directional* model), and nasal width ( $p = 0.039$ , *directional* model). Within the analysis window most associated with the phenotype, there were 137 losses and 66 gains, and 158 losses and 87 gains for the PC5 and nasal width

analysis windows, respectively (Figure S11). Within our cohort, the lead SNP, rs74921869, was not associated with PC5 ( $p = 0.895$ ) or nasal width ( $p = 0.303$ ). There was very low LD ( $\max r^2 = 0.000177$ ) between the lead SNP and the CNV windows within the region of interest. Unsurprisingly, the conditional analysis incorporating rs74921869 resulted in little change in the CNV window association with *FGFRL1* (PCS: minimum  $p_{\text{unconditioned}} = 3.89 \times 10^{-2}$ ; minimum  $p_{\text{conditioned}} = 3.89 \times 10^{-2}$ ; nasal width: minimum  $p_{\text{unconditioned}} = 3.89 \times 10^{-2}$ ; minimum  $p_{\text{conditioned}} = 3.62 \times 10^{-2}$ ). This likely indicates that either the SNP and CNV represent independent signals within the *FGFRL1* region, that both are in LD with an as-yet unidentified causal locus, or that there are differences within the two samples, as the SNP was not associated with the nose phenotypes of interest within our Bantu cohort.

### Comparison of absent/present and directional CNV classification

By design, CNV windows with all losses or all gains produced identical results. Restricting to windows with both losses and gains, we observed moderate correlation of 0.387 between the for the *absent/present* and *directional* models (Figure S12). Using various significance thresholds ( $1.0 \times 10^{-2}$ ,  $1.0 \times 10^{-4}$ ,  $1.0 \times 10^{-3}$ ,  $1.0 \times 10^{-2}$ , and  $5.0 \times 10^{-2}$ ), 36.1%–57.1% of the windows with both losses and gains are captured by only one classification. This indicates that both models were likely necessary to capture the relationship between CNVs and normal face shape. The *absent/present* model had slightly more windows that passed the nominal significance threshold ( $p < 0.05$ ) than the *directional* model ( $n = 9,503$  versus  $n = 7,494$ , respectively) (Table S12). Out of 77 windows with  $p$  values  $< 1.0 \times 10^{-4}$ , 5, 31, and 41 windows were observed in both, only *absent/present*, and only *directional*, respectively.

### Gene set analysis

Three normal facial variation gene sets were examined from Cole et al.,<sup>1</sup> Claes et al.,<sup>2</sup> and White et al.<sup>3</sup> with 11, 26, and 108 genes, respectively. The White et al.<sup>3</sup> gene set was further divided into seven gene sets based on facial region (methods). Within the Bantu sample, 25 CNV alleles from 25 subjects overlapped 2 genes: *DPP6* and *EXOC6B* (MIM: 607880). When including a  $\pm 50$ -kb flanking region around each gene, 38 CNV alleles from 38 subjects overlapped 5 genes  $\pm 50$  kb: *DPP6*, *EXOC6B*, *PDE8A* (MIM: 602972), *WNK2* (MIM: 606249), and *GABRG3* (MIM: 600233). Within the Claes et al.<sup>2</sup> gene set, 208 CNV alleles from 207 subjects overlapped one gene region: *HOXD@*. When including a  $\pm 50$ -kb flanking region around each gene, 332 CNV alleles from 305 subjects overlapped five gene regions: *HOXD@* (328 subjects overlapping), *ASPM* (MIM: 605481), *DYNC111* (MIM: 603772), *RAB7A* (MIM: 602298), and *RPS12* (MIM: 603660). Notably, 10 gene regions identified in these two SNP-based GWAS did not have an overlapping CNV in our sample even when including the additional 50-kb flanking region,

and eight gene regions had fewer than ten individuals with CNVs in the region. This suggests that association signals found in the CNV GWAS may differ from those found in the SNP GWAS simply due lack of detected CNV variation in most of the genes identified from these two GWASs of facial variation.

Within the meta-analysis gene sets from White et al.,<sup>3</sup> 332 CNV alleles from 292 subjects overlapped 20 genes. When including a  $\pm 50$ -kb flanking region around each gene, 1,745 CNV alleles from 896 subjects overlapped 32 genes  $\pm 50$  kb.

No gene set association passed multiple testing correction of  $1.34 \times 10^{-4}$ . However, each gene set derived from SNP GWAS of normal facial variation had at least one nominally significant association (subjects and methods, Table S13). The SNP GWAS gene set from the meta-analysis, quadrant 3 (lower facial area) had the strongest association with philtrum width ( $p = 2.42 \times 10^{-4}$ ), which is in quadrant 1, not quadrant 3. Complete results can be found in Table S13.

The top two associations for the analysis of FaceBase Consortium<sup>25</sup> gene sets derived from genes associated with facial abnormalities were between the phenotype upper facial height and FaceBase gene sets for (1) abnormality of the jaws ( $p = 3.26 \times 10^{-4}$ ) and (2) micrognathia ( $p = 6.02 \times 10^{-4}$ ), both with CNVs directly overlapping the gene set (Table S14). The third most significant association had phenotype and gene sets that were related to the nose. The association was between nasal ala length and abnormality of the nose ( $p = 7.36 \times 10^{-4}$ ) with CNVs within the 50-kb flanking region of the gene set. Interestingly, five of the ten most significant results are with the upper facial height phenotype. Although more research in larger sample sizes is needed, these results suggest that regions previously implicated in facial abnormalities may play a role in normal facial variation as well.

### Linkage disequilibrium between SNPs and CNVs

To assess whether GWAS arrays with dense SNP imputation can adequately capture CNVs through LD and thus eliminate the need to call CNVs, we calculated pairwise  $r^2$  between SNPs within 1 mb of CNV windows or common CNVs (Tables S15 and S16). Only one common CNV was tagged well (maximum  $r^2 = 0.809$ ). Approximately 36.8% of common CNVs were tagged moderately ( $n = 56$ ;  $0.2 \leq \text{maximum } r^2 < 0.8$ ), while the remaining 62.5% were tagged poorly ( $n = 95$ , maximum  $r^2 < 0.2$ ) (Figure 4A). Only 10.2% of the 988 CNV window regions were tagged well ( $n = 101$ ;  $r^2 > 0.8$ ), while 29.8% were tagged poorly by SNPs ( $n = 296$ ; maximum  $r^2 < 0.2$ ). The low LD supports the need to call and analyze CNVs, as CNV associations are not likely to be captured in SNP GWASs, especially in African ancestry as presented here. After adjusting for region, windows with more gains have lower average maximum pairwise  $r^2$  (mean  $r^2 = 0.3147$ ) compared with windows with more losses (mean  $r^2 = 0.3883$ ,  $p < 2.0 \times 10^{-16}$ ) (Figure 4B).



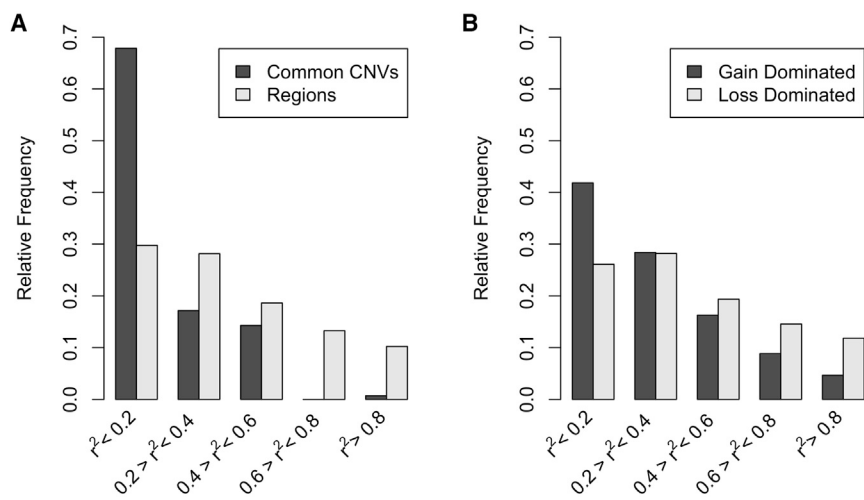

**Figure 4. LD between SNPs and CNVs.** (A) Bar chart showing frequency of common CNVs and CNV regions by strength of maximum pairwise  $r^2$  with SNPs within 1 Mb of the region. (B) Windows with more than 50% losses (light gray,  $n = 3,878$ ), windows with more than 50% gains (dark gray,  $n = 2,743$ ). Eighty-four windows that had an equal number of loss and gains had  $r^2 < 0.2$  and are not included.

## Discussion

We investigated the role of CNVs in normal facial variation in a sample of Bantu African children. We found that CNVs, both common and rare, are poorly tagged by SNPs, indicating that association signals representing CNVs were likely not captured by previous SNP-based GWASs. We completed a CNV GWAS, identifying five genetic regions with evidence of association with various normal facial phenotypes. The strongest associations were for head circumference, average upper facial depth, subnasal width, and nasal ala length. CNV association windows were poorly tagged by SNPs in all five putative regions (maximum pairwise  $r^2 = 0.100$ ). Four of these five regions were driven by CNVs  $>10$  kb, while the association between face shape and the CNVs in the region on chromosome 10 was driven by relatively small CNVs  $<10$  kb.

The region showing the strongest association ( $p_{\text{directional}} = 1.16 \times 10^{-6}$ ) is on chromosome 18 and contains the gene *NFATC1*, a transcription factor that regulates genes in the Wnt signaling pathway, which is known to play an important role in facial morphogenesis.<sup>28</sup> *NFATC1* was recently identified in a GWAS of facial asymmetry,<sup>29</sup> regulates bone mass in mouse models,<sup>30</sup> and has been linked to facial morphogenesis<sup>28,30,31</sup> and Cherubism,<sup>32</sup> a genetic disorder with abnormal bone tissue in the lower face. This is particularly interesting given one of the top associated facial phenotypes is average lower facial depth. We identified 55 losses and seven gains in *NFATC1*.

The associated region on chromosome 4 ( $p_{\text{absent/present}} = 5.20 \times 10^{-6}$ ) contains four genes, including *DOK7*, which has been implicated in a disorder characterized by craniofacial abnormalities.<sup>33</sup> This region is nested within the microdeletion in 4p16.3 associated with Wolf-Hirschhorn syndrome (MIM: 194190), which includes characteristic dysmorphic facial features.<sup>34</sup> Similarly, the associated region on chromosome 16 ( $p_{\text{absent/present}} = 9.35 \times 10^{-6}$ ) is nested

within the region associated with the 16p13.3 deletion (MIM: 610543) and duplication (MIM: 613458) syndromes, both of which include dysmorphic facial features.<sup>35</sup> Interestingly, the association observed in our study is predominantly due to gain CNVs, which reflect interstitial duplications in 16p13.3.

The other two novel associations, on chromosomes 2 and 10 (Table 1), are localized within regions that are gene-poor and do not have any obvious candidate genes that appear to have roles in facial development. However, the region on chromosome 2 contains two long intervening non-coding RNAs (lincRNAs). Although the downstream targets of these particular lincRNAs are not known, some lincRNAs are known to play a role in gene regulation and other cellular processes.<sup>36</sup>

Two of 25 gene regions from the two smaller SNP-based GWAS ( $n_{\text{Cole}} = 11$ ;  $n_{\text{Class}} = 14$ ) contained nominally significant CNV analysis windows overlapping the gene region (*DPP6* and *HOXD@*, which contains multiple genes). While the gene set analysis supported nominal association between GWAS genes and facial phenotype, this analysis was almost entirely driven by *DPP6* and the *HOXD@*. Three of 108 meta-analysis gene regions contained nominally significant CNV analysis windows overlapping the gene region; one of those three gene regions (*FGFRL1*) had CNV windows associated with a phenotype similar to the SNP meta-analysis. Using more precise phenotypes within the gene set analysis may eliminate noise to allow for detection of a significant association.

The majority of common CNVs and CNV windows are poorly tagged by SNPs, as measured by pairwise  $r^2$ . A central assumption is that our CNV calls are true CNVs. An abundance of false CNV calls would also likely result in low LD with SNPs. While we were unable to molecularly verify the CNV calls, the CNVs presented here are optimized for true positive calls based on filtering criteria applied.<sup>41</sup> Additionally, SNP haplotypes may result in higher pairwise  $r^2$  with CNVs<sup>37</sup> relative to the genotype data used here. Thus, the lack of well-tagged CNV windows and common CNVs LD suggests that SNP-based GWASs are insufficient to capture CNV contributions (and likely other more complex SVs as well), particularly for lower frequency CNVs and in samples of African

ancestry. SNP GWASs capturing CNVs are perhaps less problematic in samples of European ancestry where LD is comparatively stronger<sup>17</sup> or in studies that include haplotype data.

It is possible that SVs, including CNVs, could be imputed from reference samples containing both structural and SNV data. Given the additional complexity of functional variants with regards to alleles and variant size, reference samples will likely need to be much larger than those needed to impute SNVs, especially for low-frequency CNVs and SVs. Imputation reference panels from large and more diverse whole-genome sequencing studies, such as the Trans-Omics for Precision Medicine consortium,<sup>38</sup> have the potential to include structural variation to enable investigation of SVs. Until these reference panels are available and imputation of SVs is assessed, continued study of SVs through direct assay and calling will be necessary.

It is important to consider the ethics surrounding research that aims to understand the genetics behind normal facial variation. While the genetics of face shape have the potential to be used in questionable applications,<sup>39</sup> excluding normal facial variation—a highly heritable trait—completely from genetics research would limit the understanding of common and syndromic facial variation. Importantly, we do not predict facial features here, nor do we recommend that these data be used to predict facial features for both ethical reasons as well as poor accuracy to predict facial features for subjects especially for understudied ancestral populations.<sup>40</sup>

Here, we show that CNVs contribute to the complex phenotype of common facial variation for Bantu African children using CNVs called from GWAS array intensity data. Given the low LD with densely imputed SNPs for the CNV associations identified here, calling CNVs from GWAS array data may identify associations not detectable with solely SNP data. Thus, the large resource of existing SNP GWASs may provide a good resource for calling and assessing the role of CNVs in other complex traits. There is a dearth of studies of CNVs and in people of African ancestry and culture. Here, we add to the understanding of the genetic etiology of common facial variation for both.

## Data and code availability

The CNV data presented in this article was previously deposited in the FaceBase Consortium Database (FaceBase: <https://doi.org/10.25550/1-7330>). The genotype data used for CNV detection were previously deposited in the Database of Genotypes and Phenotypes (dbGaP: <http://www.ncbi.nlm.nih.gov/gap>; dbGaP study accession: phs000622.v1.p1). Scripts that were used to run the CNV calling algorithms are available at [https://github.com/dpastling/facebase\\_cnv](https://github.com/dpastling/facebase_cnv). Complete results from the primary analysis are available at [https://github.com/meganmichelle/CNV\\_FaceShape](https://github.com/meganmichelle/CNV_FaceShape).

## Supplemental information

Supplemental information can be found online at <https://doi.org/10.1016/j.xhgg.2021.100082>.

## Acknowledgments

This work was supported in part by a grant (DE025363) to T.H.S. by the National Institute of Dental and Craniofacial Research of the National Institutes of Health.

## Declaration of interests

F.Y. is now a postdoctoral associate at The Jackson Laboratory. H.Y. is now an employee at Bionano Genomics. J.B.C. has current affiliations with the Programs in Metabolism and Medical & Population Genetics at Broad Institute of Harvard and MIT, the Center for Genomic Medicine at Massachusetts General Hospital, and the Division of Endocrinology and Center for Basic and Translational Obesity Research at Boston Children's Hospital. A.E.H. is on the editorial board for HGG Advances. All other authors declare no competing interests.

Received: July 15, 2021

Accepted: December 21, 2021

## Web resources

BEDTools: <https://bedtools.readthedocs.io/en/latest/>  
DNACopy: <https://bioconductor.org/packages/release/bioc/html/DNACopy.html>.  
EPACTS: <https://genome.sph.umich.edu/wiki/EPACTS>.  
GENCODE: <https://www.encodegenes.org/>  
PennCNV: <http://penncnv.openbioinformatics.org/en/latest/>  
OMIM: <http://www.omim.org>.  
UCSC Genome Browser: <https://genome.ucsc.edu/cgi-bin/hgGateway>.  
VanillaICE: <https://www.bioconductor.org/packages/release/bioc/html/VanillaICE.html>.

## References

1. Cole, J.B., Manyama, M., Kimwaga, E., Mathayo, J., Larson, J.R., Liberton, D.K., Lukowiak, K., Ferrara, T.M., Riccardi, S.L., Li, M., et al. (2016). Genomewide association study of African children identifies association of SCHIP1 and PDE8A with facial size and shape. *PLoS Genet* 12, e1006174. <https://doi.org/10.1371/journal.pgen.1006174>.
2. Claes, P., Roosenboom, J., White, J.D., Swigut, T., Sero, D., Li, J., Lee, M.K., Zaidi, A., Mattern, B.C., Liebowitz, C., et al. (2018). Genome-wide mapping of global-to-local genetic effects on human facial shape. *Nat Genet* 50, 414–423. <https://doi.org/10.1038/s41588-018-0057-4>.
3. White, J.D., Indencleef, K., Naqvi, S., Eller, R.J., Hoskens, H., Roosenboom, J., Lee, M.K., Li, J., Mohammed, J., Richmond, S., et al. (2021). Insights into the genetic architecture of the human face. *Nat Genet* 53, 45–53. <https://doi.org/10.1038/s41588-020-00741-7>.
4. Cole, J.B., Manyama, M., Larson, J.R., Liberton, D.K., Ferrara, T.M., Riccardi, S.L., Li, M., Mio, W., Klein, O.D., Santorico,

- S.A., et al. (2017). Human facial shape and size heritability and genetic correlations. *Genetics* 205, 967–978. <https://doi.org/10.1534/genetics.116.193185>.
5. Karczewski, K., Francioli, L.C., Tiao, G., Cummings, B.B., Alfoldi, J., Wang, Q., et al. (2020). The mutational constraint spectrum quantified from variation in 141,456 humans. *Nature* 581 (7809), 434–443. <https://doi.org/10.1038/s41586-020-2308-7>.
  6. Zarrei, M., MacDonald, J.R., Merico, D., and Scherer, S.W. (2015). A copy number variation map of the human genome. *Nat Rev Genet* 16, 172–183. <https://doi.org/10.1038/nrg3871>.
  7. Stefansson, H., Rujescu, D., Cichon, S., Pietilainen, O.P., Ingason, A., Steinberg, S., Fossdal, R., Sigurdsson, E., Sigmundsson, T., Buizer-Voskamp, J.E., et al. (2008). Large recurrent microdeletions associated with schizophrenia. *Nature* 455, 232–236. <https://doi.org/10.1038/nature07229>.
  8. Glessner, J.T., Wang, K., Cai, G., Korvatska, O., Kim, C.E., Wood, S., Zhang, H., Estes, A., Brune, C.W., Bradfield, J.P., et al. (2009). Autism genome-wide copy number variation reveals ubiquitous and neuronal genes. *Nature* 459, 569–573. <https://doi.org/10.1038/nature07953>.
  9. Dauber, A., Yu, Y., Turchin, M.C., Chiang, C.W., Meng, Y.A., Demerath, E.W., Patel, S.R., Rich, S.S., Rotter, J.I., Schreiner, P.J., et al. (2011). Genome-wide association of copy-number variation reveals an association between short stature and the presence of low-frequency genomic deletions. *Am J Hum Genet* 89, 751–759. <https://doi.org/10.1016/j.ajhg.2011.10.014>.
  10. Butts, S.C. (2009). The facial phenotype of the velo-cardio-facial syndrome. *Int J Pediatr Otorhinolaryngol* 73, 343–350. <https://doi.org/10.1016/j.ijporl.2008.10.011>.
  11. Van Buggenhout, G., and Fryns, J.P. (2009). Angelman syndrome (AS, MIM 105830). *Eur J Hum Genet* 17, 1367–1373. <https://doi.org/10.1038/ejhg.2009.67>.
  12. Collins, R.L., Brand, H., Karczewski, K.J., Zhao, X., Alfoldi, J., Francioli, L.C., Khera, A.V., Lowther, C., Gauthier, L.D., Wang, H., et al. (2020). A structural variation reference for medical and population genetics. *Nature* 581, 444–451. <https://doi.org/10.1038/s41586-020-2287-8>.
  13. Kessler, M.D., Yerges-Armstrong, L., Taub, M.A., Shetty, A.C., Maloney, K., Jeng, L.J.B., Ruczinski, I., Levin, A.M., Williams, L.K., Beaty, T.H., et al. (2016). Challenges and disparities in the application of personalized genomic medicine to populations with African ancestry. *Nat Commun* 7, 12521. <https://doi.org/10.1038/ncomms12521>.
  14. Lauer, S., and Gresham, D. (2019). An evolving view of copy number variants. *Curr Genet* 65, 1287–1295. <https://doi.org/10.1007/s00294-019-00980-0>.
  15. Armengol, L., Villatoro, S., Gonzalez, J.R., Pantano, L., Garcia-Aragones, M., Rabionet, R., Caceres, M., and Estivill, X. (2009). Identification of copy number variants defining genomic differences among major human groups. *PLoS One* 4, e7230. <https://doi.org/10.1371/journal.pone.0007230>.
  16. Sudmant, P.H., Rausch, T., Gardner, E.J., Handsaker, R.E., Abyzov, A., Huddleston, J., Zhang, Y., Ye, K., Jun, G., Fritz, M.H., et al. (2015). An integrated map of structural variation in 2,504 human genomes. *Nature* 526, 75–81. <https://doi.org/10.1038/nature15394>.
  17. Wellcome Trust Case Control Consortium, Craddock, N., Hurles, M.E., Cardin, N., Pearson, R.D., Plagnol, V., Robson, S., Vukcevic, D., Barnes, C., Conrad, D.F., Giannoulidou, E., et al. (2010). Genome-wide association study of CNVs in 16,000 cases of eight common diseases and 3,000 shared controls. *Nature* 464, 713–720. <https://doi.org/10.1038/nature08979>.
  18. Wang, K., Li, M., Hadley, D., Liu, R., Glessner, J., Grant, S.F., Hakonarson, H., and Bucan, M. (2007). PennCNV: an integrated hidden Markov model designed for high-resolution copy number variation detection in whole-genome SNP genotyping data. *Genome Res* 17, 1665–1674. <https://doi.org/10.1101/gr.6861907>.
  19. Venkatraman, E.S., and Olshen, A.B. (2007). A faster circular binary segmentation algorithm for the analysis of array CGH data. *Bioinformatics* 23, 657–663. <https://doi.org/10.1093/bioinformatics/btl646>.
  20. Scharpf, R.B., Parmigiani, G., Pevsner, J., and Ruczinski, I. (2008). Hidden Markov models for the assessment of chromosomal alterations using high-throughput SNP arrays. *Ann Appl Stat* 2, 687–713. <https://doi.org/10.1214/07-AOAS155>.
  21. Quinlan, A.R., and Hall, I.M. (2010). BEDTools: a flexible suite of utilities for comparing genomic features. *Bioinformatics* 26, 841–842. <https://doi.org/10.1093/bioinformatics/btq033>.
  22. Kang, H.M., Sul, J.H., Service, S.K., Zaitlen, N.A., Kong, S.Y., Freimer, N.B., Sabatti, C., and Eskin, E. (2010). Variance component model to account for sample structure in genome-wide association studies. *Nat Genet* 42, 348–354. <https://doi.org/10.1038/ng.548>.
  23. Frankish, A., Diekhans, M., Ferreira, A.M., Johnson, R., Jungreis, I., Loveland, J., Mudge, J.M., Sisu, C., Wright, J., Armstrong, J., et al. (2019). GENCODE reference annotation for the human and mouse genomes. *Nucleic Acids Res* 47, D766–D773. <https://doi.org/10.1093/nar/gky955>.
  24. Kent, W.J., Sugnet, C.W., Furey, T.S., Roskin, K.M., Pringle, T.H., Zahler, A.M., and Haussler, D. (2002). The human genome browser at UCSC. *Genome Res* 12, 996–1006. <https://doi.org/10.1101/gr.229102>.
  25. Brinkley, J.F., Fisher, S., Harris, M.P., Holmes, G., Hooper, J.E., Jabs, E.W., Jones, K.L., Kesselman, C., Klein, O.D., Maas, R.L., et al. (2016). The FaceBase Consortium: a comprehensive resource for craniofacial researchers. *Development* 143, 2677–2688. <https://doi.org/10.1242/dev.135434>.
  26. Mangin, B., Siberchicot, A., Nicolas, S., Doligez, A., This, P., and Cierco-Ayrolles, C. (2012). Novel measures of linkage disequilibrium that correct the bias due to population structure and relatedness. *Heredity (Edinb)* 108, 285–291. <https://doi.org/10.1038/hdy.2011.73>.
  27. Gao, X., Starmer, J., and Martin, E.R. (2008). A multiple testing correction method for genetic association studies using correlated single nucleotide polymorphisms. *Genet Epidemiol* 32, 361–369. <https://doi.org/10.1002/gepi.20310>.
  28. Brugmann, S.A., Goodnough, L.H., Gregorieff, A., Leucht, P., ten Berge, D., Fuerer, C., Clevers, H., Nusse, R., and Helms, J.A. (2007). Wnt signaling mediates regional specification in the vertebrate face. *Development* 134, 3283–3295. <https://doi.org/10.1242/dev.005132>.
  29. Rolfe, S., Lee, S.I., and Shapiro, L. (2018). Associations between genetic data and quantitative assessment of normal facial asymmetry. *Front Genet* 9, 659. <https://doi.org/10.3389/fgene.2018.00659>.
  30. Winslow, M.M., Pan, M., Starbuck, M., Gallo, E.M., Deng, L., Karsenty, G., and Crabtree, G.R. (2006). Calcineurin/NFAT signaling in osteoblasts regulates bone mass. *Dev Cell* 10, 771–782. <https://doi.org/10.1016/j.devcel.2006.04.006>.
  31. Doraczynska-Kowalik, A., Nelke, K.H., Pawlak, W., Sasiadek, M.M., and Gerber, H. (2017). Genetic factors involved in

- mandibular prognathism. *J Craniofac Surg* 28, e422–e431. <https://doi.org/10.1097/SCS.00000000000003627>.
32. Kadlub, N., Sessiecq, Q., Dainese, L., Joly, A., Lehalle, D., Marlin, S., Badoual, C., Galmiche, L., Majoufre-Lefebvre, C., Berdal, A., et al. (2016). Defining a new aggressiveness classification and using NFATc1 localization as a prognostic factor in cherubism. *Hum Pathol* 58, 62–71. <https://doi.org/10.1016/j.humpath.2016.07.019>.
33. Vogt, J., Morgan, N.V., Marton, T., Maxwell, S., Harrison, B.J., Beeson, D., and Maher, E.R. (2009). Germline mutation in DOK7 associated with fetal akinesia deformation sequence. *J Med Genet* 46, 338–340. <https://doi.org/10.1136/jmg.2008.065425>.
34. Battaglia, A., Filippi, T., and Carey, J.C. (2008). Update on the clinical features and natural history of Wolf-Hirschhorn (4p-) syndrome: experience with 87 patients and recommendations for routine health supervision. *Am J Med Genet C Semin Med Genet* 148C, 246–251. <https://doi.org/10.1002/ajmg.c.30187>.
35. Thienpont, B., Bena, F., Breckpot, J., Philip, N., Menten, B., Van Esch, H., Scalais, E., Salamone, J.M., Fong, C.T., Kussmann, J.L., et al. (2010). Duplications of the critical Rubinstein-Taybi deletion region on chromosome 16p13.3 cause a novel recognisable syndrome. *J Med Genet* 47, 155–161. <https://doi.org/10.1136/jmg.2009.070573>.
36. Ulitsky, I., and Bartel, D.P. (2013). lincRNAs: genomics, evolution, and mechanisms. *Cell* 154, 26–46. <https://doi.org/10.1016/j.cell.2013.06.020>.
37. Nyangiri, O.A., Noyes, H., Mulindwa, J., Ilboudo, H., Kabore, J.W., Ahouty, B., Koffi, M., Asina, O.F., Mumba, D., Ofon, E., et al. (2020). Copy number variation in human genomes from three major ethno-linguistic groups in Africa. *BMC Genomics* 21, 289. <https://doi.org/10.1186/s12864-020-6669-y>.
38. Taliun, D., Harris, D.N., Kessler, M.D., Carlson, J., Szpiech, Z.A., Torres, R., Taliun, S.A.G., Corvelo, A., Gogarten, S.M., Kang, H.M., et al. (2021). Sequencing of 53,831 diverse genomes from the NHLBI TOPMed Program. *Nature* 590, 290–299. <https://doi.org/10.1038/s41586-021-03205-y>.
39. Arnold, C. (2020). The controversial company using DNA to sketch the faces of criminals. *Nature* 585, 178–181. <https://doi.org/10.1038/d41586-020-02545-5>.
40. Sirugo, G., Williams, S.M., and Tishkoff, S.A. (2019). The missing diversity in human genetic studies. *Cell* 177, 1080. <https://doi.org/10.1016/j.cell.2019.04.032>.
41. Yilmaz, Feyza, Null, Megan, Astling, David, Yu, Hung-Chun, Cole, Joanne, Santorico, Stephanie A Santorico, et al. (2021). Genome-wide copy number variations in a large cohort of bantu African children. *BMC Med Genomics* 14 (1). <https://pubmed.ncbi.nlm.nih.gov/34001112/>.

**HGGA, Volume 3**

**Supplemental information**

**Genome-wide analysis of copy number  
variants and normal facial variation  
in a large cohort of Bantu Africans**

**Megan Null, Feyza Yilmaz, David Astling, Hung-Chun Yu, Joanne B. Cole, Benedikt Hallgrímsson, Stephanie A. Santorico, Richard A. Spritz, Tamim H. Shaikh, and Audrey E. Hendricks**

|                  |               |
|------------------|---------------|
| Figures S1 – S12 | Pages 1 – 13  |
| Tables S1 – S2   | Page 14 – 15  |
| Table S5         | Page 16       |
| Tables S7 – S8   | Pages 17 – 18 |
| Table S12        | Page 19       |

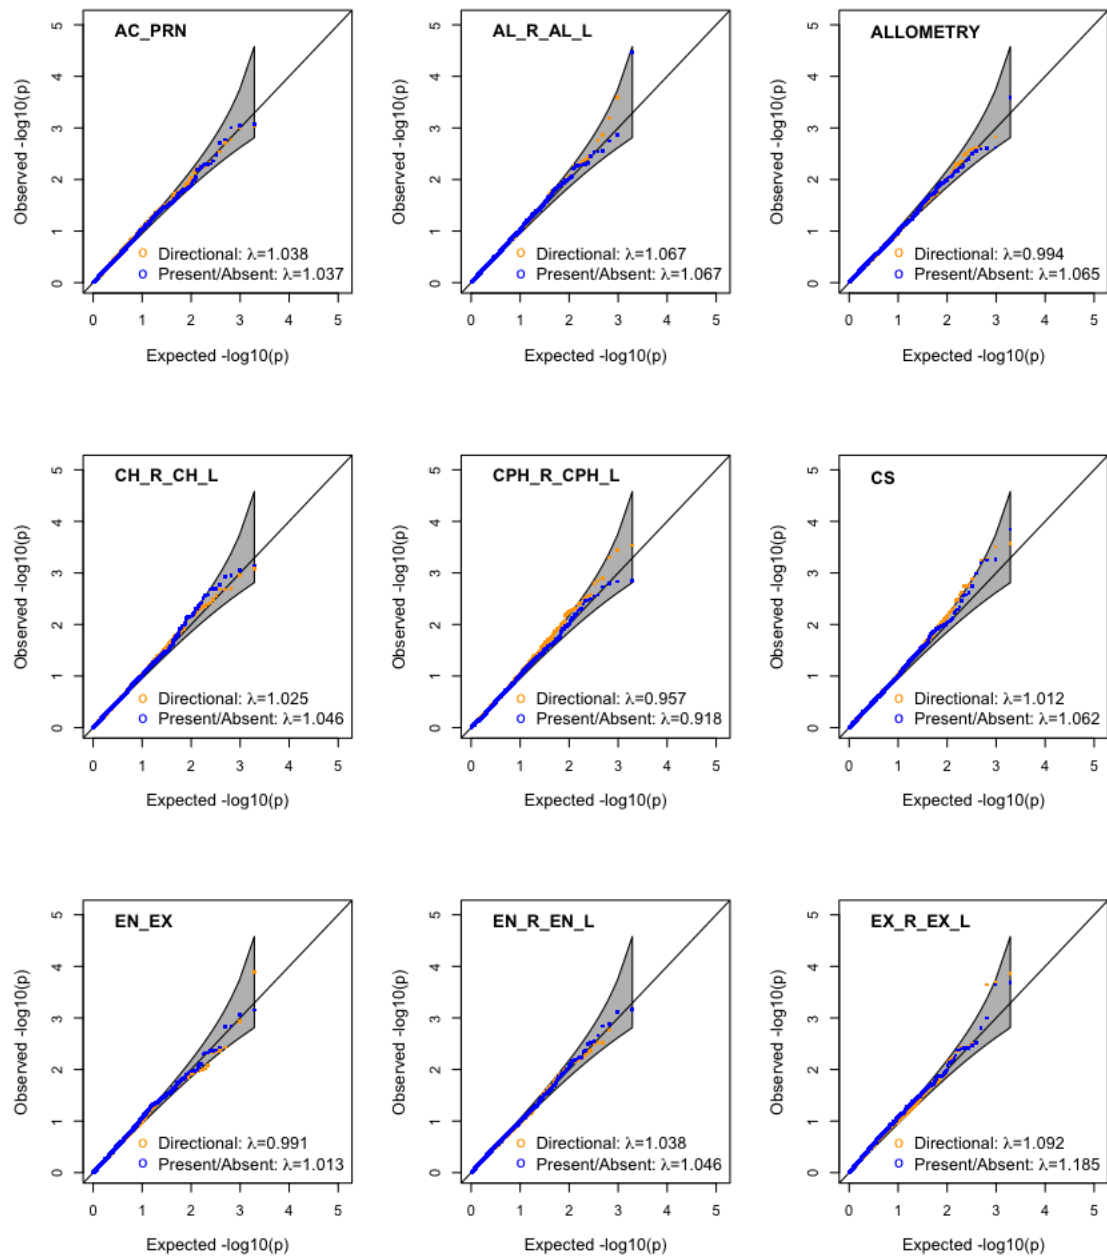

**Figure S1. Quantile-Quantile Plots.** QQ plots for nine phenotypes for the *absent/present* (blue) and *directional* (orange) models with respective  $\lambda$  values. Due to high correlation between overlapping analysis windows within a region, a random window from each region was selected for the QQ plot.

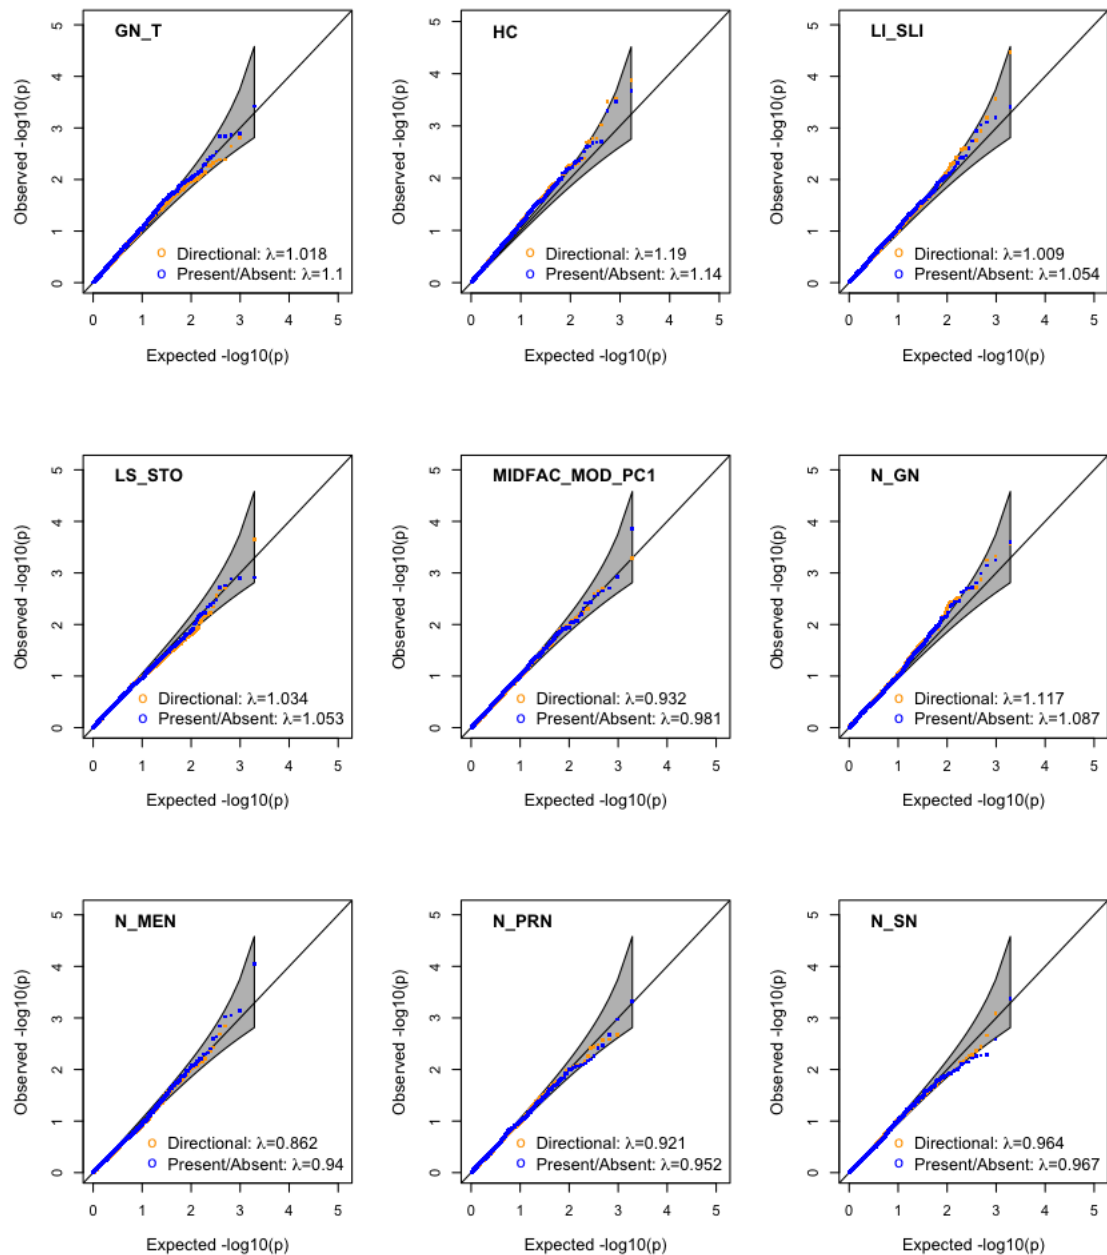

**Figure S2. Quantile-Quantile Plots.** QQ plots for nine phenotypes for the *absent/present* (blue) and *directional* (orange) models with respective  $\lambda$  values. Due to high correlation between overlapping analysis windows within a region, a random window from each region was selected for the QQ plot.



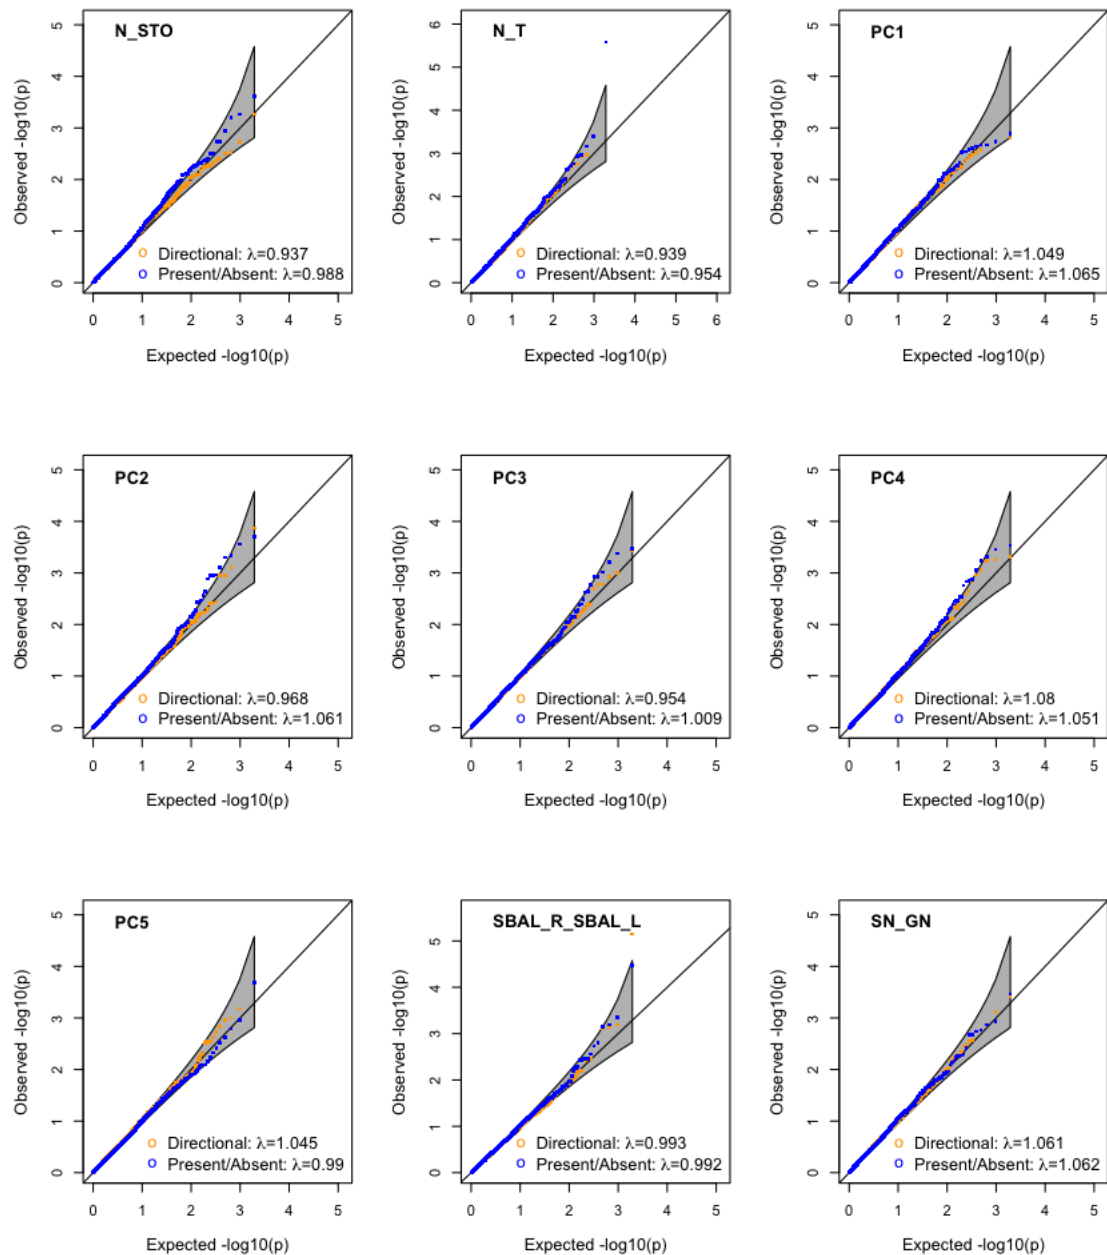

**Figure S3. Quantile-Quantile Plots.** QQ plots for nine phenotypes for the *absent/present* (blue) and *directional* (orange) models with respective  $\lambda$  values. Due to high correlation between overlapping analysis windows within a region, a random window from each region was selected for the QQ plot.

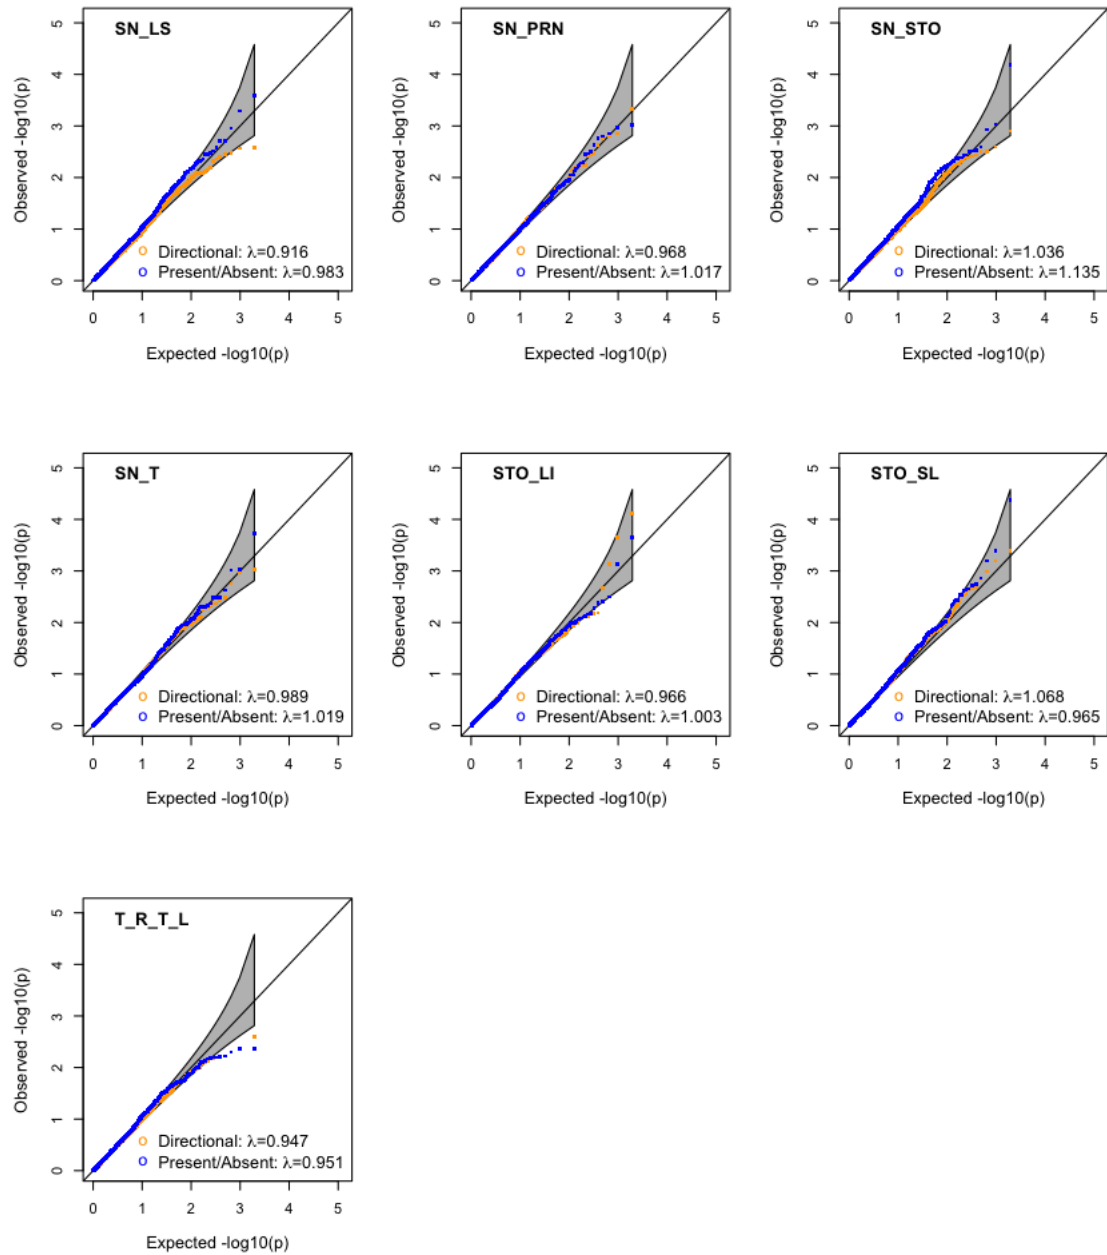

**Figure S4. Quantile-Quantile Plots.** QQ plots for seven phenotypes for the *absent/present* (blue) and *directional* (orange) models with respective  $\lambda$  values. Due to high correlation between overlapping analysis windows within a region, a random window from each region was selected for the QQ plot.

**A**

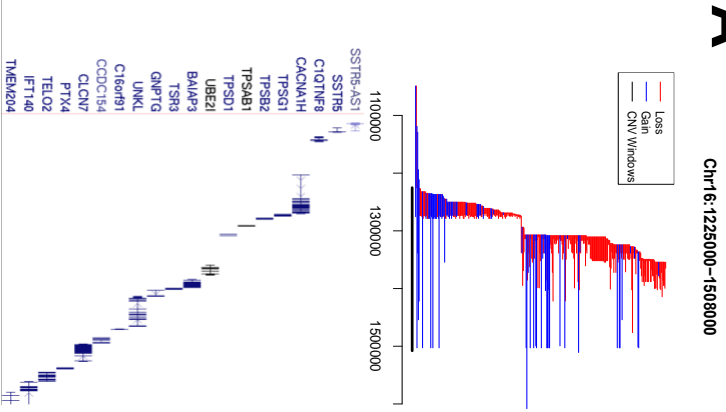

**B**

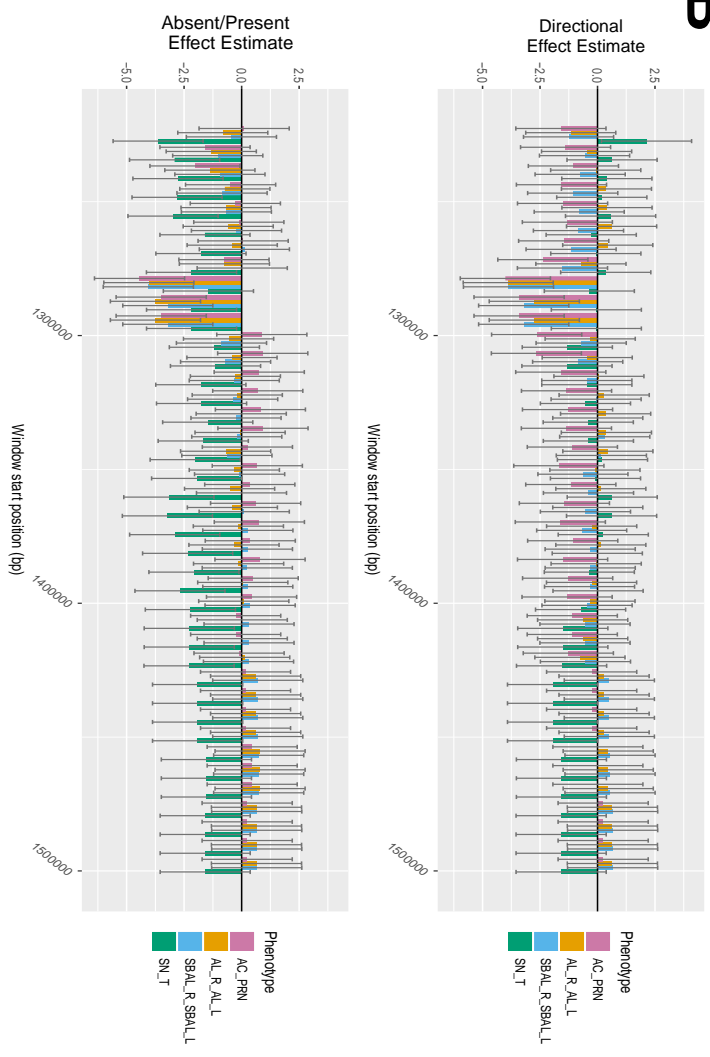

**Figure S5 A). Region Plot, Chromosome 16.** Loss (red) and gain (blue) CNVs. Each line represents a unique CNV allele from one individual with the genes in the region shown below. The CNV analysis region is shown in black. **B). Region Plot, Chromosome 16.** Test statistic t-values (effect estimate / standard error of effect estimate) across the region with 95% confidence intervals in the *directional* model (top) and *absent/present* model (bottom). Phenotypes with at least one window with p-value  $< 5 \times 10^{-4}$  are shown: nasal ala length (AC\_PRN), nasal width (AL\_R\_AL\_L), subnasal width (SBAL\_R\_SBAL\_L), and midfacial depth (SN\_T).

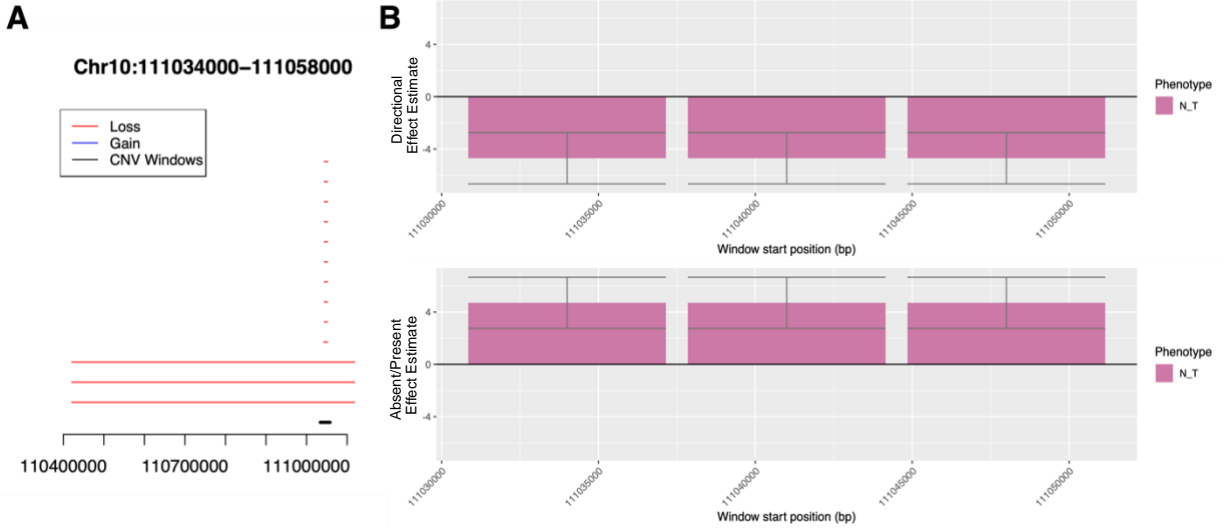

**Figure S6. Region Plot, Chromosome 10. A)** Loss (red) and gain (blue, none present) CNVs. Each line represents a unique CNV allele from one individual with the genes in the region shown below. The CNV analysis region is shown in black. This region does not have any genes. **B)** Test statistic t-values (effect estimate / standard error of effect estimate) across the region with 95% confidence intervals the *directional* model (top) and *absent/present* model (bottom). Upper facial depth (N\_T), the only phenotype with p-value  $< 5 \times 10^{-4}$ , is shown.

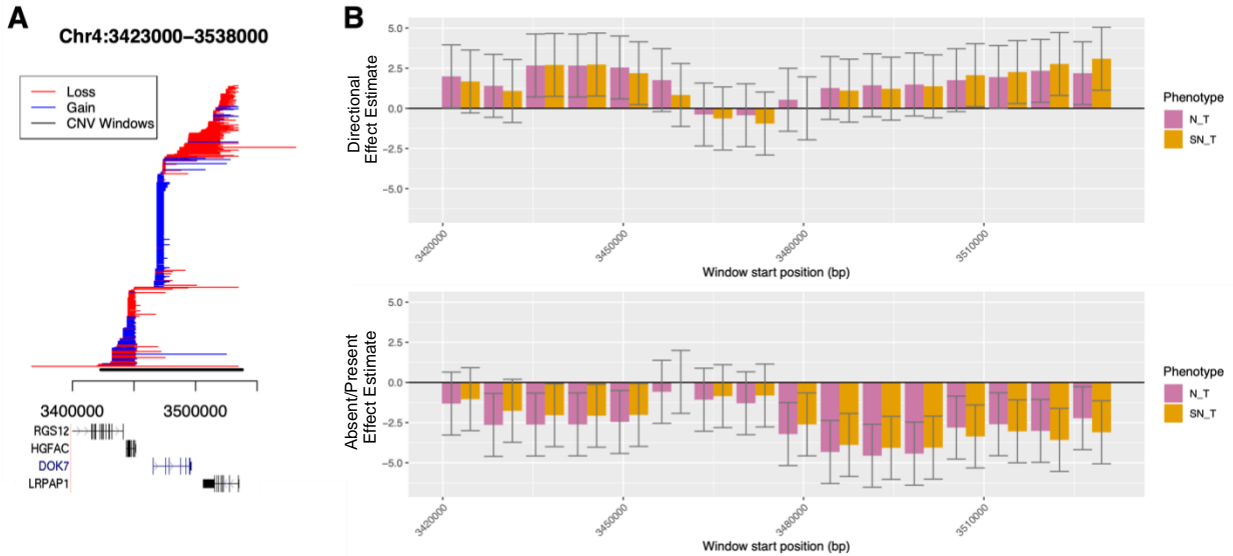

**Figure S7. Region Plot, Chromosome 4.** **A)** Loss (red) and gain (blue) CNVs. Each line represents a unique CNV allele from one individual with the genes in the region shown below. The CNV analysis region is shown in black **B)** Test statistic t-values (effect estimate / standard error of effect estimate) across the region with 95% confidence intervals in the *directional* model (top) and *absent/present* model (bottom). Phenotypes with at least one window with p-value <  $5 \times 10^{-4}$  are shown: upper facial depth (N\_T) and midfacial depth (SN\_T).

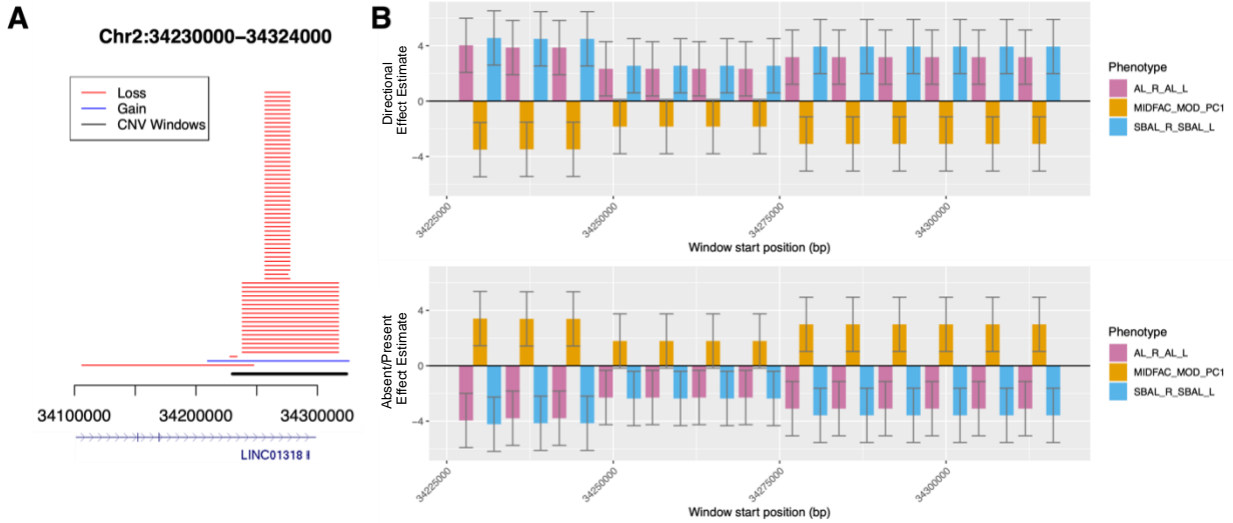

**Figure S8. Region Plot, Chromosome 2.** **A**) Loss (red) and gain (blue) CNVs. Each line represents a unique CNV allele from one individual with the genes in the region shown below. The CNV analysis region is shown in black **B**) Test statistic t-values (effect estimate / standard error of effect estimate) across the region with 95% confidence intervals in the *directional* model (top) and *absent/present* model (bottom). Phenotypes with at least one window with p-value <  $5 \times 10^{-4}$  are shown: nasal width (AL\_R\_AL\_L), mid-face principal component 1 (MIDFAC\_MOD\_PC1), and subnasal width (SBAL\_R\_SBAL\_L).

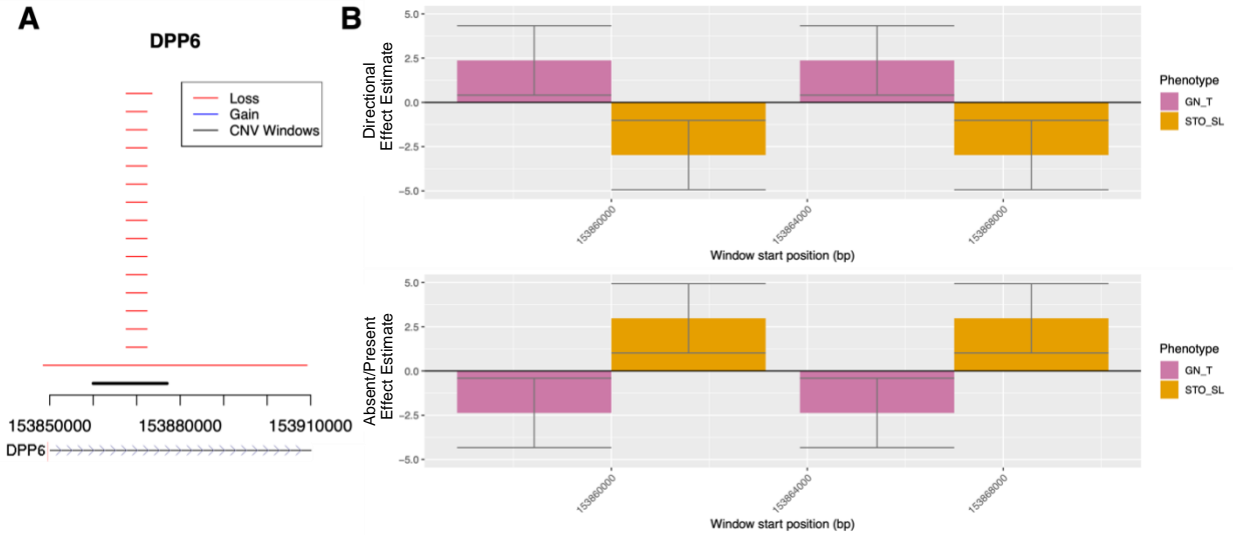

**Figure S9. Region Plot, *DPP6*.** A) Loss (red) and gain (blue) CNVs. Each line represents a unique CNV allele from one individual with the genes in the region shown below. The CNV analysis region is shown in black B) Test statistic t-values (effect estimate / standard error of effect estimate) across the region with 95% confidence intervals in the *directional* model (top) and *absent/present* model (bottom). Phenotypes with at least one window with p-value  $< 5 \times 10^{-4}$  are shown: lower facial depth (GN\_T) and lower lip height (STO\_SL).



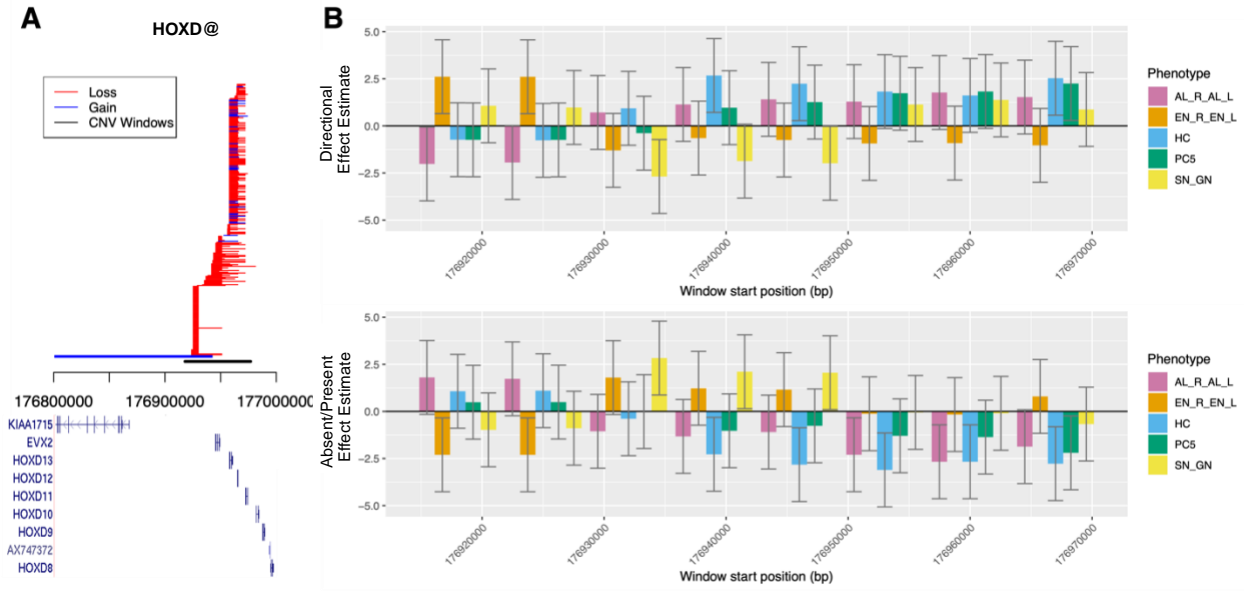

**Figure S10. Region Plot, *HOXD@*.** **A**) Loss (red) and gain (blue) CNVs. Each line represents a unique CNV allele from one individual with the genes in the region shown below. The CNV analysis region is shown in black **B**) Test statistic t-values (effect estimate / standard error of effect estimate) across the region with 95% confidence intervals in the *directional* model (top) and *absent/present* model (bottom). Phenotypes with at least one window with p-value  $< 5 \times 10^{-4}$  are shown: nasal width (AL\_R\_AL\_L), inner canthal width (EN\_R\_EN\_L), head circumference (HC), principal component 5: nose shape, height of mouth (PC5), and lower facial height (SN\_GN).

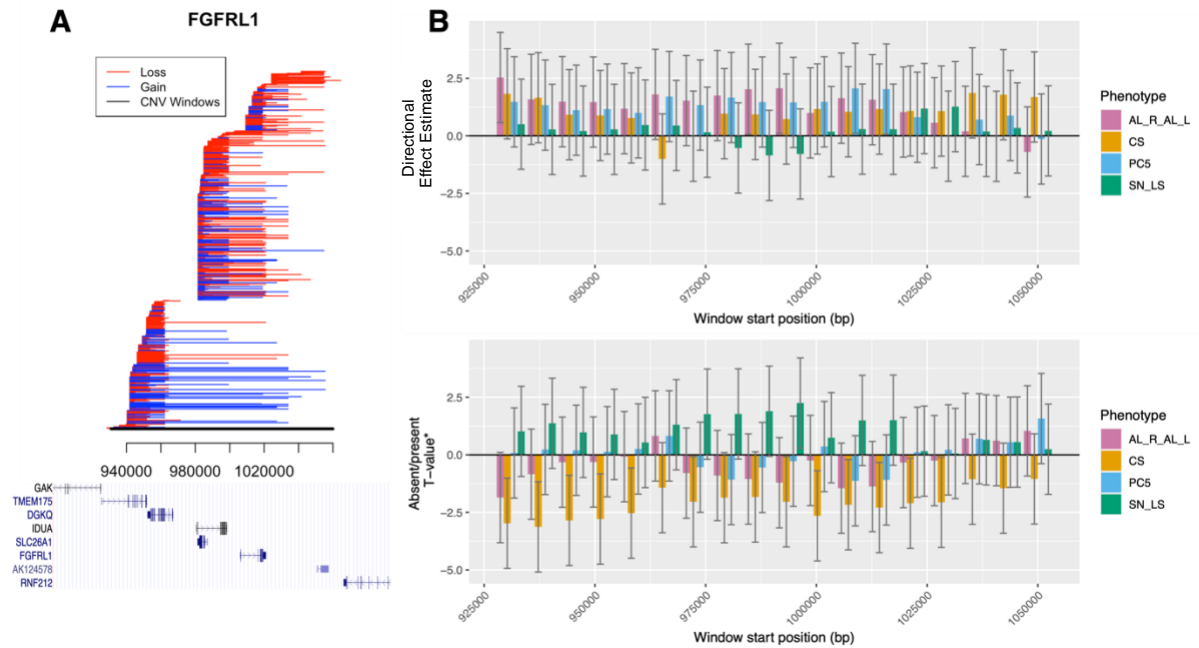

**Figure S11. Region Plot, *FGFR1*.** **A)** Loss (red) and gain (blue) CNVs. Each line represents a unique CNV allele from one individual with the genes in the region shown below. The CNV analysis region is shown in black **B)** Test statistic t-values (effect estimate / standard error of effect estimate) across the region with 95% confidence intervals in the *directional* model (top) and *absent/present* model (bottom). Phenotypes with at least one window with p-value < 0.05 are shown: nasal width (AL\_R\_AL\_L), centroid size (CS), principal component 5: nose shape, height of mouth (PC5), and philtrum length (SN\_LS).

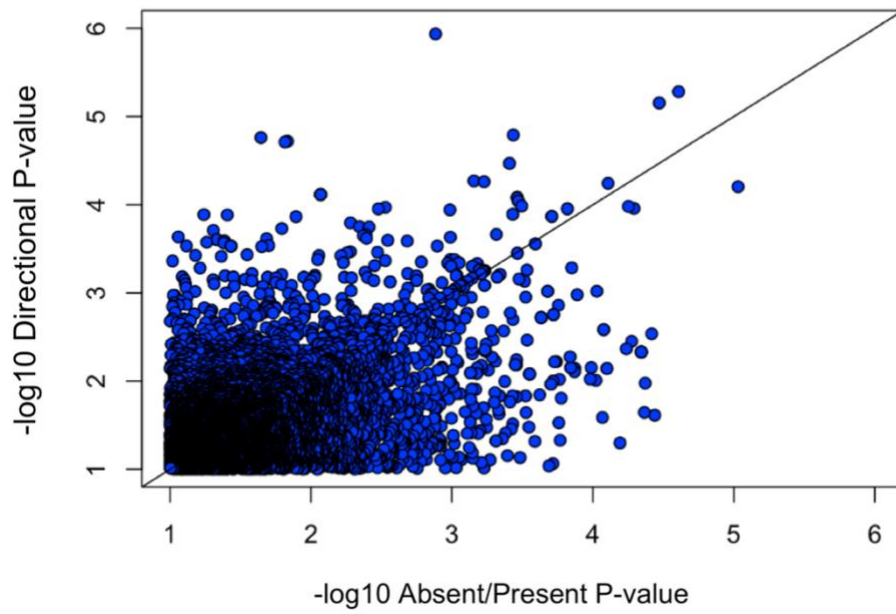

**Figure S12. Scatterplot Comparing *Absent/Present* and *Directional* models.** Scatterplot of  $-\log_{10} pvalue$  from each model. Each point represents a window with both gains and losses.

**Table S1. Facial Phenotypes**

| Measurement              | Description                                                                               |
|--------------------------|-------------------------------------------------------------------------------------------|
| Total Facial Measurement |                                                                                           |
| Centroid Size            | Face size                                                                                 |
| Allometry                | Variation in shape due to size                                                            |
| Mid-Face PC1             | The first principal component from a midfacial landmark network around the nose and mouth |
| Principal Component 1    | Upper facial height, mid facial width                                                     |
| Principal Component 2    | Overall facial height, lower facial height                                                |
| Principal Component 3    | Upper and middle facial width                                                             |
| Principal Component 4    | Width of nose, mandible height                                                            |
| Principal Component 5    | Nose shape, height of mouth                                                               |
| Linear Distances         |                                                                                           |
| AL_R_AL_L                | Nasal Width                                                                               |
| AC_PRN                   | Nasal Ala Length (average)                                                                |
| CH_R_CH_L                | Mouth Width                                                                               |
| CPH_R_CPH_L              | Philtrum Width                                                                            |
| EN_EX                    | Palpebral Fissure Length (average)                                                        |
| EN_R_EN_L                | Inner canthal Width                                                                       |
| EX_R_EX_L                | Outer canthal Width                                                                       |
| GN_T                     | Lower Facial Depth (average)                                                              |
| LI_SL                    | Cutaneous Lower Lip Height                                                                |
| LS_STO                   | Upper Vermillion Height                                                                   |
| N_GN                     | Morphological Facial Height                                                               |
| N_MEN                    | Nasion to Midendocanthion                                                                 |
| N_PRN                    | Nasal Bridge Length                                                                       |
| N_SN                     | Nasal Height                                                                              |
| N_STO                    | Upper Facial Height                                                                       |
| N_T                      | Upper Facial Depth (average)                                                              |
| SBAL_R_SBAL_L            | Subnasal Width                                                                            |
| SN_GN                    | Lower Facial Height                                                                       |
| SN_LS                    | Philtrum Length                                                                           |
| SN_PRN                   | Nasal Protrusion                                                                          |
| SN_STO                   | Upper Lip Height                                                                          |
| SN_T                     | Midfacial Depth (average)                                                                 |
| STO_LI                   | Lower Vermillion Height                                                                   |
| STO_SL                   | Lower lip height                                                                          |
| T_R_T_L                  | Facial Width                                                                              |
| Non-landmark defined     |                                                                                           |
| Head Circumference       | Direct occipital frontal circumference                                                    |

**Table S2. Non-missing Phenotypes**

| <b>Phenotype</b> | <b>Non-missing Subjects</b> |
|------------------|-----------------------------|
| CS               | 3388                        |
| ALLOMETRY        | 3388                        |
| MIDFAC_MOD_PC1   | 3387                        |
| PC1              | 3388                        |
| PC2              | 3388                        |
| PC3              | 3388                        |
| PC4              | 3388                        |
| PC5              | 3388                        |
| T_R_T_L          | 3388                        |
| N_T              | 3386                        |
| SN_T             | 3388                        |
| GN_T             | 3385                        |
| N_GN             | 3388                        |
| N_STO            | 3387                        |
| SN_GN            | 3387                        |
| EN_R_EN_L        | 3386                        |
| EX_R_EX_L        | 3387                        |
| EN_EX            | 3384                        |
| AL_R_AL_L        | 3388                        |
| SBAL_R_SBAL_L    | 3384                        |
| SN_PRN           | 3387                        |
| AC_PRN           | 3378                        |
| N_SN             | 3385                        |
| N_PRN            | 3386                        |
| CH_R_CH_L        | 3387                        |
| CPH_R_CPH_L      | 3387                        |
| SN_LS            | 3388                        |
| SN_STO           | 3386                        |
| STO_SL           | 3385                        |
| LS_STO           | 3387                        |
| STO_LI           | 3388                        |
| LI_SLI           | 3382                        |
| N_MEN            | 3387                        |
| HC               | 2589                        |

**Table S5. Family Wise Error Rate Significance Thresholds**

| <b>Analysis</b>                                              | <b>Effective Number of Phenotypes</b> | <b>Effective Number of Tests*</b> | <b>Study wide FWER significance threshold</b> |
|--------------------------------------------------------------|---------------------------------------|-----------------------------------|-----------------------------------------------|
| <b>Window Analysis (Primary)</b>                             | 23                                    | 6913                              | $3.14 \times 10^{-7}$                         |
| <b>Window Analysis (Secondary)</b>                           | 23                                    | 1519                              | $1.433 \times 10^{-6}$                        |
| <b>Common CNV Analysis</b>                                   | 23                                    | 166                               | $1.31 \times 10^{-5}$                         |
| <b>Common Facial Variation SNP GWAS gene set (Primary)</b>   | 22                                    | 17                                | $1.34 \times 10^{-4}$                         |
| <b>Common Facial Variation SNP GWAS gene set (Secondary)</b> | 22                                    | 11                                | $2.01 \times 10^{-4}$                         |
| <b>Phenotypic GWAS gene set (Primary)</b>                    | 22                                    | 26                                | $8.74 \times 10^{-5}$                         |
| <b>Phenotypic GWAS gene set (Secondary)</b>                  | 22                                    | 26                                | $8.74 \times 10^{-5}$                         |

\*For one phenotype

**Table S7. CNV summary statistics**

|                           | <b>CNV Length</b> | <b>Loss Length</b> | <b>Gain Length</b> | <b>Total Number of CNVs per Person</b> | <b>Total Number of Losses per Person</b> | <b>Total Number of Gains per Person</b> | <b>Gain/Loss Ratio per Person*</b> |
|---------------------------|-------------------|--------------------|--------------------|----------------------------------------|------------------------------------------|-----------------------------------------|------------------------------------|
| <b>Minimum</b>            | 1001              | 1001               | 1001               | 18                                     | 15                                       | 0                                       | 0.006536                           |
| <b>Quantile 1</b>         | 4375              | 4088               | 8251               | 43                                     | 35                                       | 5                                       | 0.1111                             |
| <b>Median</b>             | 8904              | 7946               | 18680              | 50                                     | 41                                       | 8                                       | 0.1818                             |
| <b>Mean</b>               | 21600             | 16960              | 44310              | 63.88                                  | 53.05                                    | 10.83                                   | 0.2591                             |
| <b>Quantile 3</b>         | 20950             | 17100              | 45940              | 63                                     | 48                                       | 12                                      | 0.2745                             |
| <b>Maximum</b>            | 2741000           | 1753000            | 2741000            | 342                                    | 413                                      | 154                                     | 4.667                              |
| <b>Standard Deviation</b> | 45564.48          | 31301.84           | 82605.6            | 45.705                                 | 44.22                                    | 11.359                                  | 0.3122                             |

\*Subset of subjects with at least one gain

**Table S8. Top regions with CNVs <10 kb**

| <b>Region</b>                     | <b>Associated Phenotype</b>     | <b>Absent/<br/>Present<br/>All CNVs</b> | <b>Absent/Present<br/>CNVs &gt;10kb</b> | <b>Directional<br/>All CNVs</b> | <b>Directional<br/>CNVs<br/>&gt;10kb</b> | <b>All CNVs<br/>N loss; n gain<br/>(CNVs &gt;10kb:<br/>N loss; n gain)</b> |
|-----------------------------------|---------------------------------|-----------------------------------------|-----------------------------------------|---------------------------------|------------------------------------------|----------------------------------------------------------------------------|
| Chr18:<br>77147000-<br>77283000   | Head<br>Circumference           | $1.31 \times 10^{-3}$                   | $1.34 \times 10^{-3}$                   | $1.16 \times 10^{-6}$           | $2.41 \times 10^{-6}$                    | 73;12<br>(67; 12)                                                          |
|                                   | Lower Facial<br>Depth (average) | $1.03 \times 10^{-4}$                   | $1.67 \times 10^{-4}$                   | $7.03 \times 10^{-3}$           | $4.29 \times 10^{-3}$                    | 55;7<br>(53; 4)                                                            |
|                                   | Upper Lip<br>Height             | $3.47 \times 10^{-4}$                   | $1.14 \times 10^{-4}$                   | $5.80 \times 10^{-3}$           | $1.14 \times 10^{-3}$                    | 55;7<br>(53; 4)                                                            |
|                                   | PC1                             | $3.71 \times 10^{-4}$                   | $6.45 \times 10^{-4}$                   | $3.05 \times 10^{-2}$           | $3.00 \times 10^{-3}$                    | 55;7<br>(53; 4)                                                            |
| Chr10:<br>111034000-<br>111058000 | Upper Facial<br>Depth (average) | $2.64 \times 10^{-6}$                   | Too few CNVs                            | $2.64 \times 10^{-6}$           | Too few<br>CNVs                          | 13;0<br>(3;0)                                                              |
| Chr4:<br>3423000-<br>3538000      | Upper Facial<br>Depth – average | $5.20 \times 10^{-6}$                   | No small CNVs                           | $1.51 \times 10^{-1}$           | No small<br>CNVs                         | 41; 7<br>(41;7)                                                            |
|                                   | Midfacial Depth<br>(average)    | $4.79 \times 10^{-5}$                   |                                         | $2.21 \times 10^{-1}$           |                                          | 41; 7<br>(41;7)                                                            |
| Chr2:<br>34230000-<br>34324000    | Subnasal Width                  | $2.47 \times 10^{-5}$                   | $3.38 \times 10^{-5}$                   | $5.23 \times 10^{-6}$           | $7.03 \times 10^{-6}$                    | 19; 1<br>(18;1)                                                            |
|                                   | Nasal Width                     | $7.82 \times 10^{-5}$                   | $1.52 \times 10^{-4}$                   | $5.71 \times 10^{-5}$           | $1.11 \times 10^{-4}$                    | 19; 1<br>(18;1)                                                            |
|                                   | Mid-Face PC1                    | $6.63 \times 10^{-4}$                   | $7.16 \times 10^{-4}$                   | $4.65 \times 10^{-4}$           | $4.99 \times 10^{-4}$                    | 19; 1<br>(18;1)                                                            |
| Chr16:<br>1225000-<br>1508000     | Nasal Ala Length<br>– average   | $9.35 \times 10^{-6}$                   | No small CNVs                           | $6.26 \times 10^{-5}$           | No small<br>CNVs                         | 1; 9<br>(1;9)                                                              |
|                                   | Subnasal Width                  | $5.12 \times 10^{-5}$                   |                                         | $1.10 \times 10^{-4}$           |                                          | 1; 9<br>(1;9)                                                              |
|                                   | Nasal Width                     | $5.60 \times 10^{-5}$                   |                                         | $1.05 \times 10^{-4}$           |                                          | 1; 9<br>(1;9)                                                              |
|                                   | Midfacial Depth<br>(average)    | $2.85 \times 10^{-4}$                   |                                         | $3.32 \times 10^{-2}$           |                                          | 12; 7<br>(12;7)                                                            |



**Table S12. Primary analysis windows below p-value thresholds**

| <b>P-value<br/>Threshold</b>           | <b>Total</b> | <b>Directional model only</b> |         | <b>Both models</b> |         | <b>Absent/Present<br/>model only</b> |         |
|----------------------------------------|--------------|-------------------------------|---------|--------------------|---------|--------------------------------------|---------|
|                                        |              | N Windows                     | Percent | N Windows          | Percent | N Windows                            | Percent |
| <b><math>5.0 \times 10^{-2}</math></b> | 20758        | 7494                          | 36.1%   | 3761               | 18.1%   | 9503                                 | 45.8%   |
| <b><math>1.0 \times 10^{-2}</math></b> | 4726         | 1797                          | 38.0%   | 656                | 13.9%   | 2273                                 | 48.1%   |
| <b><math>1.0 \times 10^{-3}</math></b> | 580          | 215                           | 37.1%   | 76                 | 13.1%   | 289                                  | 49.8%   |
| <b><math>1.0 \times 10^{-4}</math></b> | 77           | 31                            | 40.3%   | 5                  | 6.5%    | 41                                   | 53.2%   |
| <b><math>1.0 \times 10^{-5}</math></b> | 7            | 4                             | 57.1%   | 0                  | 0.0%    | 3                                    | 42.9%   |
